# Supplementary material for: Computational Promoter Modeling Identifies the Modes of Transcriptional Regulation in Hematopoietic Stem Cells
Source: PLoS One. 2014 Apr 7;9(4):e93853. doi: 10.1371/journal.pone.0093853 (PMC3977923; doi:10.1371/journal.pone.0093853)
Supplement: Table S5 — Low expressed transcription factors (Class D). (XLSX) [file pone.0093853.s010.xlsx]

## Sheet: S5
Table S5: Low expressed transcription factors (Class D)
Gene	Description
4933413G19Rik	RIKEN cDNA 4933413G19 gene
Adipoq	adiponectin, C1Q and collagen domain containing
Adnp2	ADNP homeobox 2
Aebp1	AE binding protein 1
Ahr	aryl-hydrocarbon receptor
Ahrr	aryl-hydrocarbon receptor repressor
Aire	autoimmune regulator (autoimmune polyendocrinopathy candidiasis ectodermal dystrophy)
Als2	amyotrophic lateral sclerosis 2 (juvenile)
Alx4	aristaless-like homeobox 4
Ar	cytochrome P450, family 19, subfamily a, polypeptide 1
Arid3b	AT rich interactive domain 3B (BRIGHT-like)
Arid5b	AT rich interactive domain 5B (MRF1-like)
Ascl2	achaete-scute complex homolog 2 (Drosophila)
Atf3	activating transcription factor 3
Atf5	activating transcription factor 5
Atf6	activating transcription factor 6
Atf7	activating transcription factor 7
Bach1	BRCA1 interacting protein C-terminal helicase 1
Bach2	BTB and CNC homology 2
Batf3	basic leucine zipper transcription factor, ATF-like 3
Bcl6	B cell leukemia/lymphoma 6
Bcl6b	B cell CLL/lymphoma 6, member B
Bhlhe40	basic helix-loop-helix family, member e40
Casz1	castor zinc finger 1
Cbx2	chromobox 2
Cebpa	CCAAT/enhancer binding protein (C/EBP), alpha
Cebpb	CCAAT/enhancer binding protein (C/EBP), beta
Cebpe	CCAAT/enhancer binding protein (C/EBP), epsilon
Chd7	chromodomain helicase DNA binding protein 7
Clgn	calmegin
Clock	circadian locomotor output cycles kaput
Cntf	ciliary neurotrophic factor
Creb3l1	cAMP responsive element binding protein 3-like 1
Creb3l2	cAMP responsive element binding protein 3-like 2
Creb3l3	cAMP responsive element binding protein 3-like 3
Creb3l4	cAMP responsive element binding protein 3-like 4
Creb5	cAMP responsive element binding protein 5
Crebl2	cAMP responsive element binding protein-like 2
Csl	citrate synthase like
Dbx1	developing brain homeobox 1
E2f1	E2F transcription factor 1
E2f2	E2F transcription factor 2
E2f5	E2F transcription factor 5
E2f7	E2F transcription factor 7
Ear12	eosinophil-associated, ribonuclease A family, member 12
Ear2	eosinophil-associated, ribonuclease A family, member 2
Ebf1	early B cell factor 1
Ebf4	early B cell factor 4
Egr2	early growth response 2
Elf5	E74-like factor 5
Elk1	ELK1, member of ETS oncogene family
Elk4	ELK4, member of ETS oncogene family
Ep300	E1A binding protein p300
Epx	eosinophil peroxidase
Erf	Ets2 repressor factor
Esr1	estrogen receptor 1 (alpha)
Esr2	estrogen receptor 2 (beta)
Esrra	estrogen related receptor, alpha
Etv1	ets variant gene 1
Etv4	ets variant gene 4 (E1A enhancer binding protein, E1AF)
Eya3	eyes absent 3 homolog (Drosophila)
Fgf3	fibroblast growth factor 3
Fosl2	fos-like antigen 2
Foxd2	forkhead box D2
Foxh1	forkhead box H1
Foxj2	forkhead box J2
Foxk1	forkhead box K1
Foxk2	forkhead box K2
Foxm1	forkhead box M1
Foxo3	forkhead box O3
Foxo4	forkhead box O4
Foxp2	forkhead box P2
Foxp3	forkhead box P3
Foxp4	forkhead box P4
Gabbr1	gamma-aminobutyric acid (GABA) B receptor, 1
Gabpb2	GA repeat binding protein, beta 2
Gbx2	gastrulation brain homeobox 2
Gfi1	growth factor independent 1
Gli1	GLI-Kruppel family member GLI1
Gli3	GLI-Kruppel family member GLI3
Glis2	GLIS family zinc finger 2
Glis3	GLIS family zinc finger 3
Gm98	predicted gene 98
Gmeb1	glucocorticoid modulatory element binding protein 1
Gmeb2	glucocorticoid modulatory element binding protein 2
Grhl1	grainyhead-like 1 (Drosophila)
Grhl3	grainyhead-like 3 (Drosophila)
Gtf2ird1	general transcription factor II I repeat domain-containing 1
Hap1	huntingtin-associated protein 1
Hdx	highly divergent homeobox
Hes1	hairy and enhancer of split 1 (Drosophila)
Hes5	hairy and enhancer of split 5 (Drosophila)
Hesx1	homeobox gene expressed in ES cells
Hey1	hairy/enhancer-of-split related with YRPW motif 1
Hic2	hypermethylated in cancer 2
Hif3a	hypoxia inducible factor 3, alpha subunit
Hira	histone cell cycle regulation defective homolog A (S. cerevisiae)
Hivep2	human immunodeficiency virus type I enhancer binding protein 2
Hivep3	human immunodeficiency virus type I enhancer binding protein 3
Hlx	H2.0-like homeobox
Hmbox1	homeobox containing 1
Homez	homeodomain leucine zipper-encoding gene
Hoxa2	homeobox A2
Hoxa3	homeobox A3
Hoxa4	homeobox A4
Hoxa6	homeobox A6
Hoxb2	homeobox B2
Hoxb3	homeobox B3
Hoxb4	homeobox B4
Hoxb6	homeobox B6
Hoxb7	homeobox B7
Hoxc10	homeobox C10
Hsf4	heat shock transcription factor 4
Hspa1a	heat shock protein 1A
Id3	inhibitor of DNA binding 3
Ikzf4	IKAROS family zinc finger 4
Il6	interleukin 6
Insm1	insulinoma-associated 1
Insm2	insulinoma-associated 2
Irf4	interferon regulatory factor 4
Isl1	ISL1 transcription factor, LIM/homeodomain
Jdp2	Jun dimerization protein 2
Kcnip3	Kv channel interacting protein 3, calsenilin
Klf11	Kruppel-like factor 11
Klf12	Kruppel-like factor 12
Klf4	Kruppel-like factor 4 (gut)
Klf5	Kruppel-like factor 5
Klf8	Kruppel-like factor 8
Klrg1	killer cell lectin-like receptor subfamily G, member 1
Lbx2	ladybird homeobox homolog 2 (Drosophila)
Ldb2	LIM domain binding 2
Ldb3	LIM domain binding 3
Lef1	lymphoid enhancer binding factor 1
Lmo1	LIM domain only 1
Lmo7	LIM domain only 7
Maf	avian musculoaponeurotic fibrosarcoma (v-maf) AS42 oncogene homolog
Mafb	v-maf musculoaponeurotic fibrosarcoma oncogene family, protein B (avian)
Maff	v-maf musculoaponeurotic fibrosarcoma oncogene family, protein F (avian)
Mapk8ip1	mitogen-activated protein kinase 8 interacting protein 1
Me1	malic enzyme 1, NADP(+)-dependent, cytosolic
Mecp2	methyl CpG binding protein 2
Mef2a	myocyte enhancer factor 2A
Mef2b	myocyte enhancer factor 2B
Mef2d	myocyte enhancer factor 2D
Meis2	Meis homeobox 2
Meis3	Meis homeobox 3
Mesp2	mesoderm posterior 2
Mitf	NLR family, apoptosis inhibitory protein 3
Mixl1	Mix1 homeobox-like 1 (Xenopus laevis)
Mlxip	MLX interacting protein
Mlxipl	MLX interacting protein-like
Mpp4	membrane protein, palmitoylated 4 (MAGUK p55 subfamily member 4)
Msx1	homeobox, msh-like 1
Mtf1	metal response element binding transcription factor 1
Mxi1	Max interacting protein 1
Mybl1	myeloblastosis oncogene-like 1
Mybl2	myeloblastosis oncogene-like 2
Myog	myogenin
Mysm1	myb-like, SWIRM and MPN domains 1
Mzf1	myeloid zinc finger 1
Ncoa6	nuclear receptor coactivator 6
Ncor2	nuclear receptor co-repressor 2
Nf1	neurofibromatosis 1
Nfatc2	nuclear factor of activated T cells, cytoplasmic, calcineurin dependent 2
Nfatc4	nuclear factor of activated T cells, cytoplasmic, calcineurin dependent 4
Nfe2l3	nuclear factor, erythroid derived 2, like 3
Nfib	nuclear factor I/B
Notch3	notch 3
Notch4	notch 4
Npas1	neuronal PAS domain protein 1
Npas2	neuronal PAS domain protein 2
Npas3	neuronal PAS domain protein 3
Nr1d1	nuclear receptor subfamily 1, group D, member 1
Nr1d2	nuclear receptor subfamily 1, group D, member 2
Nr1h3	nuclear receptor subfamily 1, group H, member 3
Nr1i3	nuclear receptor subfamily 1, group I, member 3
Nr2c1	nuclear receptor subfamily 2, group C, member 1
Nr2e3	nuclear receptor subfamily 2, group E, member 3
Nr2f2	nuclear receptor subfamily 2, group F, member 2
Nr2f6	nuclear receptor subfamily 2, group F, member 6
Nr6a1	nuclear receptor subfamily 6, group A, member 1
Ovol1	OVO homolog-like 1 (Drosophila)
Pax6	paired box gene 6
Pax8	paired box gene 8
Pbx3	pre B cell leukemia homeobox 3
Pcbp4	poly(rC) binding protein 4
Pcgf2	polycomb group ring finger 2
Pgr	progesterone receptor
Pitx2	paired-like homeodomain transcription factor 2
Plag1	pleiomorphic adenoma gene 1
Plagl1	pleiomorphic adenoma gene-like 1
Plxna2	plexin A2
Pou2af1	POU domain, class 2, associating factor 1
Pou2f1	POU domain, class 2, transcription factor 1
Pou5f1	POU domain, class 5, transcription factor 1
Pou5f2	POU domain class 5, transcription factor 2
Pou6f1	POU domain, class 6, transcription factor 1
Pparg	peroxisome proliferator activated receptor gamma
Ppargc1a	peroxisome proliferative activated receptor, gamma, coactivator 1 alpha
Prdm1	PR domain containing 1, with ZNF domain
Prdm4	PR domain containing 4
Prkar1b	protein kinase, cAMP dependent regulatory, type I beta
Prkar2a	protein kinase, cAMP dependent regulatory, type II alpha
Ptn	pleiotrophin
Rarg	retinoic acid receptor, gamma
Rb1	retinoblastoma 1
Rbms1	RNA binding motif, single stranded interacting protein 1
Relb	avian reticuloendotheliosis viral (v-rel) oncogene related B
Rfx1	regulatory factor X, 1 (influences HLA class II expression)
Rfx2	regulatory factor X, 2 (influences HLA class II expression)
Rfx3	regulatory factor X, 3 (influences HLA class II expression)
Rfx5	regulatory factor X, 5 (influences HLA class II expression)
Rfxap	regulatory factor X-associated protein
Ror1	receptor tyrosine kinase-like orphan receptor 1
Rorb	RAR-related orphan receptor beta
Rsl1	regulator of sex limited protein 1
Sall2	sal-like 2 (Drosophila)
Sfn	REX2, RNA exonuclease 2 homolog (S. cerevisiae)
Six5	sine oculis-related homeobox 5
Smad6	SMAD family member 6
Smad7	SMAD family member 7
Smarca1	SWI/SNF related, matrix associated, actin dependent regulator of chromatin, subfamily a, member 1
Snai1	snail homolog 1 (Drosophila)
Snai3	snail homolog 3 (Drosophila)
Snapc4	small nuclear RNA activating complex, polypeptide 4
Sox12	SRY-box containing gene 12
Sox13	SRY-box containing gene 13
Sox15	SRY-box containing gene 15
Sox18	SRY-box containing gene 18
Sox5	SRY-box containing gene 5
Sox6	SRY-box containing gene 6
Sp6	ubiquitin specific peptidase 53
Spib	Spi-B transcription factor (Spi-1/PU.1 related)
Srf	serum response factor
Tbx4	T-box 4
Tbx6	T-box 6
Tcf20	transcription factor 20
Tcf7	transcription factor 7, T cell specific
Tcf7l1	transcription factor 7 like 1 (T cell specific, HMG box)
Tead1	TEA domain family member 1
Tead3	TEA domain family member 3
Tef	thyrotroph embryonic factor
Tfe3	transcription factor E3
Tfeb	transcription factor EB
Thrb	thyroid hormone receptor beta
Trerf1	transcriptional regulating factor 1
Trim24	tripartite motif-containing 24
Trim33	tripartite motif-containing 33
Trps1	trichorhinophalangeal syndrome I (human)
Tshz3	teashirt zinc finger family member 3
Utf1	undifferentiated embryonic cell transcription factor 1
Wbp7	WW domain binding protein 7
Xiap	X-linked inhibitor of apoptosis
Yy2	Yy2 transcription factor
Zbed6	zinc finger, BED domain containing 6
Zbtb12	zinc finger and BTB domain containing 12
Zbtb16	zinc finger and BTB domain containing 16
Zbtb17	zinc finger and BTB domain containing 17
Zbtb22	zinc finger and BTB domain containing 22
Zbtb3	zinc finger and BTB domain containing 3
Zbtb32	zinc finger and BTB domain containing 32
Zbtb33	zinc finger and BTB domain containing 33
Zbtb41	zinc finger and BTB domain containing 41 homolog
Zbtb44	zinc finger and BTB domain containing 44
Zbtb6	zinc finger and BTB domain containing 6
Zbtb7b	zinc finger and BTB domain containing 7B
Zfat	zinc finger and AT hook domain containing
Zfhx4	zinc finger homeodomain 4
Zfp105	zinc finger protein 105
Zfp112	zinc finger protein 112
Zfp128	zinc finger protein 128
Zfp182	zinc finger protein 182
Zfp184	zinc finger protein 184 (Kruppel-like)
Zfp192	zinc finger protein 192
Zfp2	zinc finger protein 2
Zfp238	zinc finger protein 238
Zfp276	zinc finger protein (C2H2 type) 276
Zfp28	zinc finger protein 28
Zfp287	zinc finger protein 287
Zfp3	zinc finger protein 3
Zfp30	zinc finger protein 30
Zfp316	zinc finger protein 316
Zfp319	zinc finger protein 319
Zfp329	zinc finger protein 329
Zfp354a	zinc finger protein 354A
Zfp354b	zinc finger protein 354B
Zfp354c	zinc finger protein 354C
Zfp37	zinc finger protein 37
Zfp382	zinc finger protein 382
Zfp39	zinc finger protein 39
Zfp426	zinc finger protein 426
Zfp46	zinc finger protein 46
Zfp507	zinc finger protein 507
Zfp513	zinc finger protein 513
Zfp516	zinc finger protein 516
Zfp518b	zinc finger protein 518B
Zfp521	zinc finger protein 521
Zfp526	zinc finger protein 526
Zfp532	zinc finger protein 532
Zfp553	zinc finger protein 553
Zfp57	zinc finger protein 57
Zfp574	zinc finger protein 574
Zfp575	zinc finger protein 575
Zfp579	zinc finger protein 579
Zfp580	zinc finger protein 580
Zfp583	zinc finger protein 583
Zfp592	zinc finger protein 592
Zfp618	zinc fingerprotein 618
Zfp628	zinc finger protein 628
Zfp629	zinc finger protein 629
Zfp647	zinc finger protein 647
Zfp652	zinc finger protein 652
Zfp653	zinc finger protein 653
Zfp654	zinc finger protein 654
Zfp661	zinc finger protein 661
Zfp667	zinc finger protein 667
Zfp668	zinc finger protein 668
Zfp689	zinc finger protein 689
Zfp697	zinc finger protein 697
Zfp74	zinc finger protein 72
Zfp768	zinc finger protein 768
Zfp770	zinc finger protein 770
Zfp771	zinc finger protein 771
Zfp775	zinc finger protein 775
Zfp786	zinc finger protein 786
Zfp787	zinc finger protein 787
Zfp82	zinc finger protein 82
Zfp827	zinc finger protein 827
Zfp91	zinc finger protein 91
Zfp92	zinc finger protein 92
Zfp93	zinc finger protein 93
Zfp932	zinc finger protein 932
Zfp94	zinc finger protein 94
Zfpm1	zinc finger protein, multitype 1
Zhx2	zinc fingers and homeoboxes 2
Zhx3	zinc fingers and homeoboxes 3
Zik1	zinc finger protein interacting with K protein 1
Zkscan5	zinc finger with KRAB and SCAN domains 5
Zscan10	zinc finger and SCAN domain containing 10
Zscan12	zinc finger and SCAN domain containing 12
Zscan2	zinc finger and SCAN domain containing 2
