# Supplementary material for: Computational Promoter Modeling Identifies the Modes of Transcriptional Regulation in Hematopoietic Stem Cells
Source: PLoS One. 2014 Apr 7;9(4):e93853. doi: 10.1371/journal.pone.0093853 (PMC3977923; doi:10.1371/journal.pone.0093853)
Supplement: Table S9 — TFBSs significantly different in the regression coefficient between LT- and ST-HSCs (Class B). (XLSX) [file pone.0093853.s014.xlsx]

## Sheet: S9
Table S9: TFBSs significantly different in regression coefficient between LT- and ST-HSCs (Class B)
	RC (Regression Coeff.)
TFBS	LT-HSC	ST-HSC	p-value	*adjusted p-value	TFs
AP-1	-0.0025	0.0061	0	0	Fos Fosb Fosl1 Fosl2 Jun Junb Jund
AP-4	0.0049	0.0116	0	0	Tfap4
Arnt	0.0068	0.0146	0	0	Arnt
C/EBPdelta	-0.0022	0.0059	0	0	Cebpd
C/EBPgamma	-0.003	-0.0127	0	0	Cebpg
CDP	0.0082	0.0167	0	0	Cux1
CETS	0.0264	0.0077	0	0	Ets1
CIZ	-0.0122	-0.0236	0	0	Zfp384
CREB	-0.0066	-0.0306	0	0	Creb1 Crem
Egr-1	-0.0094	-0.0247	0	0	Egr1
GATA-6	0.0128	0.035	0	0	Gata6
GCNF	-0.0026	-0.0144	0	0	Nr6a1
HIC1	-0.0059	-0.0126	0	0	Hic1
HNF1	0.0035	-0.0042	0	0	Hnf1a Hnf1b
HOXA7	-0.0097	-0.025	0	0	Hoxa7
IPF1	-0.0232	-0.0105	0	0	Pdx1
KAISO	-0.0134	-0.0068	0	0	Zbtb33
Kid3	0.0391	0.0283	0	0	Zfp354c
MAF	0.0118	0.0026	0	0	Bach1 Bach2 Maf Mafb Maff Mafg Mafk Nfe2 Nfe2l1 Nfe2l2 Nfe2l3
MEIS1	-0.007	-0.0213	0	0	Hoxa9 Meis1
MYB	-0.0158	-0.0065	0	0	Myb
OG-2	-0.0041	-0.0138	0	0	Nobox
PBX1	-0.0308	-0.0234	0	0	Pbx1 Pbx2 Pbx3
POU3F2	-0.0166	-0.0334	0	0	Pou3f2
Pax-3	0.004	-0.004	0	0	Pax3
RORalpha	0.0123	0.0304	0	0	Rora
SF1	0.025	0.0339	0	0	Nr5a1
SOX9	-0.0021	-0.01	0	0	Sox9
SRY	0.0084	0.0278	0	0	Sry
TBP	0.0035	0.0109	0	0	Tbp
TGIF	0.0117	0.024	0	0	Tgif1
Tal-1beta:E47	0.0015	0.0075	0	0	Tal1 Tcf3
Tst-1	0.0038	0.0117	0	0	Pou3f1
VDR_CAR,_PXR	na	0.0074	0	0	Nr1i2 Nr1i3 Rxra Rxrb Vdr
YY1	0.0264	0.0176	0	0	Yy1
CKROX	0.0064	0.0182	1e-06	0.000138	Zbtb7b
ER	-0.0079	-0.0151	1e-06	0.000138	Esr1
HLF	0.0016	0.0088	3e-06	0.000414	Hlf
PLZF	0.004	na	3e-06	0.000414	Zbtb16
Spz1	0.0045	0.0106	5e-06	0.00069	Spz1
TBX5	-0.0022	0.0027	5e-06	0.00069	Tbx5
BCL6	0.03	0.021	6e-06	0.000828	Bcl6
Bach2	na	0.0075	1.4e-05	0.001932	Bach2
Sp3	-0.0038	-0.0086	1.7e-05	0.002346	Sp3
GLI	-0.0073	-0.0133	2e-05	0.00276	Gli1 Gli2 Gli3 Glis1
ZF5	0.0211	0.0146	5.6e-05	0.007728	Zfp161
IRF-2	0.007	0.0117	7e-05	0.00966	Irf2
Evi-1	-0.0043	-0.012	7.1e-05	0.009798	Mecom
IRF	0.0094	0.0147	0.00015	0.0207	Irf1 Irf2 Irf3 Irf4 Irf5 Irf6 Irf7 Irf8
PR	-0.0043	-0.0127	0.000156	0.021528	pr
Pax-4	-0.0094	-0.0044	0.000171	0.023598	Pax4
GABP	0.0021	-0.003	0.000179	0.024702	Gabpa Gabpb1
DMRT3	-0.0259	-0.0341	0.000297	0.040986	Dmrt3
E4BP4	0.0101	0.0041	0.000336	0.046368	Nfil3
FOXP1	0.0024	0.0095	0.000411	0.056718	Foxp1
Oct-4_(POU5F1)	0.0225	0.0286	0.000457	0.063066	Pou5f1
MAZ	-0.0074	-0.0172	0.000574	0.079212	Maz
PPARA	0.0065	0.0107	0.000581	0.080178	Ppara Rxra
*adjusted p-value: bonferrnoni corrected p-value
