# Supplementary material for: Computational Promoter Modeling Identifies the Modes of Transcriptional Regulation in Hematopoietic Stem Cells
Source: PLoS One. 2014 Apr 7;9(4):e93853. doi: 10.1371/journal.pone.0093853 (PMC3977923; doi:10.1371/journal.pone.0093853)
Supplement: Table S10 — Enriched GO terms in Class A. (XLSX) [file pone.0093853.s015.xlsx]

## Sheet: S10
Table S10: Enriched GO terms in Class A
Class	Accession	GO Term	Counts	Fraction	DAVID (Accession)	GO Term	EASE (p-value)	Adjusted p-value (bonferroni)
A	GO:0008152	metabolism	28	0.2333
					GO:0006355	regulation of transcription, DNA-dependent	0.00153814	0.92775
					GO:0006357	regulation of transcription from RNA polymerase II promoter	4.95039e-05	0.0810332
					GO:0009889	regulation of biosynthetic process	0.00135323	0.90089
					GO:0009891	positive regulation of biosynthetic process	2.8395e-06	0.0048353
					GO:0009893	positive regulation of metabolic process	1.77316e-05	0.0298146
					GO:0010468	regulation of gene expression	0.00342748	0.997151
					GO:0010556	regulation of macromolecule biosynthetic process	0.00336598	0.996834
					GO:0010557	positive regulation of macromolecule biosynthetic process	3.35623e-06	0.00571271
					GO:0010604	positive regulation of macromolecule metabolic process	3.04417e-05	0.0506377
					GO:0010628	positive regulation of gene expression	2.2894e-06	0.00390038
					GO:0019219	regulation of nucleobase, nucleoside, nucleotide and nucleic acid metabolic process	0.00157208	0.931823
					GO:0019222	regulation of metabolic process	0.000536097	0.599629
					GO:0031323	regulation of cellular metabolic process	0.000263915	0.362731
					GO:0031325	positive regulation of cellular metabolic process	5.68376e-06	0.00965529
					GO:0031326	regulation of cellular biosynthetic process	0.00198992	0.966633
					GO:0031328	positive regulation of cellular biosynthetic process	2.36933e-06	0.00403629
					GO:0042325	regulation of phosphorylation	0.00985767	1
					GO:0045859	regulation of protein kinase activity	0.00941419	1
					GO:0045893	positive regulation of transcription, DNA-dependent	4.90889e-06	0.00834449
					GO:0045935	positive regulation of nucleobase, nucleoside, nucleotide and nucleic acid metabolic process	5.01984e-07	0.000856521
					GO:0045944	positive regulation of transcription from RNA polymerase II promoter	5.19278e-06	0.00882492
					GO:0050790	regulation of catalytic activity	0.00748176	0.999997
					GO:0051171	regulation of nitrogen compound metabolic process	0.0019232	0.962599
					GO:0051173	positive regulation of nitrogen compound metabolic process	9.28682e-07	0.001584
					GO:0051252	regulation of RNA metabolic process	0.00208373	0.971579
					GO:0051254	positive regulation of RNA metabolic process	5.51858e-06	0.00937601
					GO:0060255	regulation of macromolecule metabolic process	0.00996022	1
					GO:0080090	regulation of primary metabolic process	0.00378706	0.998461
A	GO:0016265	death	13	0.1083
					GO:0006915	apoptosis	0.00023307	0.328269
					GO:0008219	cell death	0.000292607	0.393199
					GO:0010941	regulation of cell death	7.74482e-05	0.123842
					GO:0010942	positive regulation of cell death	0.00909712	1
					GO:0012501	programmed cell death	0.000293084	0.393692
					GO:0016265	death	0.000155271	0.232847
					GO:0042981	regulation of apoptosis	5.79571e-05	0.094199
					GO:0043065	positive regulation of apoptosis	0.00811957	0.999999
					GO:0043066	negative regulation of apoptosis	0.0062194	0.999976
					GO:0043067	regulation of programmed cell death	7.10933e-05	0.114286
					GO:0043068	positive regulation of programmed cell death	0.00858625	1
					GO:0043069	negative regulation of programmed cell death	0.00722679	0.999996
					GO:0060548	negative regulation of cell death	0.00741324	0.999997
A	GO:0008219	cell death	12	0.1
					GO:0006915	apoptosis	0.00023307	0.328269
					GO:0008219	cell death	0.000292607	0.393199
					GO:0010941	regulation of cell death	7.74482e-05	0.123842
					GO:0010942	positive regulation of cell death	0.00909712	1
					GO:0012501	programmed cell death	0.000293084	0.393692
					GO:0042981	regulation of apoptosis	5.79571e-05	0.094199
					GO:0043065	positive regulation of apoptosis	0.00811957	0.999999
					GO:0043066	negative regulation of apoptosis	0.0062194	0.999976
					GO:0043067	regulation of programmed cell death	7.10933e-05	0.114286
					GO:0043068	positive regulation of programmed cell death	0.00858625	1
					GO:0043069	negative regulation of programmed cell death	0.00722679	0.999996
					GO:0060548	negative regulation of cell death	0.00741324	0.999997
A	GO:0007275	development	12	0.1
					GO:0001568	blood vessel development	0.00255086	0.98722
					GO:0001944	vasculature development	0.00103592	0.829536
					GO:0007275	multicellular organismal development	5.31676e-07	0.00090716
					GO:0007399	nervous system development	0.0017968	0.953574
					GO:0022008	neurogenesis	0.0033667	0.996838
					GO:0030097	hemopoiesis	0.00884142	1
					GO:0046697	decidualization	0.00713453	0.999995
					GO:0048513	organ development	0.000204077	0.29418
					GO:0048514	blood vessel morphogenesis	0.00473585	0.999697
					GO:0048534	hemopoietic or lymphoid organ development	0.0077419	0.999998
					GO:0048699	generation of neurons	0.00704194	0.999994
					GO:0048731	system development	2.99295e-07	0.000510766
A	GO:0009058	biosynthesis	10	0.0833
					GO:0006355	regulation of transcription, DNA-dependent	0.00153814	0.92775
					GO:0006357	regulation of transcription from RNA polymerase II promoter	4.95039e-05	0.0810332
					GO:0009889	regulation of biosynthetic process	0.00135323	0.90089
					GO:0009891	positive regulation of biosynthetic process	2.8395e-06	0.0048353
					GO:0010556	regulation of macromolecule biosynthetic process	0.00336598	0.996834
					GO:0010557	positive regulation of macromolecule biosynthetic process	3.35623e-06	0.00571271
					GO:0031326	regulation of cellular biosynthetic process	0.00198992	0.966633
					GO:0031328	positive regulation of cellular biosynthetic process	2.36933e-06	0.00403629
					GO:0045893	positive regulation of transcription, DNA-dependent	4.90889e-06	0.00834449
					GO:0045944	positive regulation of transcription from RNA polymerase II promoter	5.19278e-06	0.00882492
A	GO:0006139	nucleobase, nucleoside, nucleotide and nucleic acid metabolism	8	0.0667
					GO:0006355	regulation of transcription, DNA-dependent	0.00153814	0.92775
					GO:0006357	regulation of transcription from RNA polymerase II promoter	4.95039e-05	0.0810332
					GO:0019219	regulation of nucleobase, nucleoside, nucleotide and nucleic acid metabolic process	0.00157208	0.931823
					GO:0045893	positive regulation of transcription, DNA-dependent	4.90889e-06	0.00834449
					GO:0045935	positive regulation of nucleobase, nucleoside, nucleotide and nucleic acid metabolic process	5.01984e-07	0.000856521
					GO:0045944	positive regulation of transcription from RNA polymerase II promoter	5.19278e-06	0.00882492
					GO:0051252	regulation of RNA metabolic process	0.00208373	0.971579
					GO:0051254	positive regulation of RNA metabolic process	5.51858e-06	0.00937601
A	GO:0007154	cell communication	7	0.0583
					GO:0007167	enzyme linked receptor protein signaling pathway	0.00624367	0.999977
					GO:0009966	regulation of signal transduction	2.52802e-05	0.042236
					GO:0009967	positive regulation of signal transduction	0.0058159	0.999953
					GO:0010627	regulation of protein kinase cascade	0.00290684	0.993051
					GO:0010646	regulation of cell communication	6.89024e-05	0.110967
					GO:0010740	positive regulation of protein kinase cascade	0.00667274	0.999989
					GO:0017015	regulation of transforming growth factor beta receptor signaling pathway	0.00239375	0.983278
A	GO:0019725	cell homeostasis	6	0.05
					GO:0006873	cellular ion homeostasis	0.00152976	0.926707
					GO:0006874	cellular calcium ion homeostasis	0.00175127	0.949815
					GO:0006875	cellular metal ion homeostasis	0.000643251	0.66659
					GO:0019725	cellular homeostasis	0.000914074	0.790082
					GO:0030003	cellular cation homeostasis	0.00015882	0.237481
					GO:0055082	cellular chemical homeostasis	0.000642267	0.666029
A	GO:0007165	signal transduction	6	0.05
					GO:0007167	enzyme linked receptor protein signaling pathway	0.00624367	0.999977
					GO:0009966	regulation of signal transduction	2.52802e-05	0.042236
					GO:0009967	positive regulation of signal transduction	0.0058159	0.999953
					GO:0010627	regulation of protein kinase cascade	0.00290684	0.993051
					GO:0010740	positive regulation of protein kinase cascade	0.00667274	0.999989
					GO:0017015	regulation of transforming growth factor beta receptor signaling pathway	0.00239375	0.983278
A	GO:0030154	cell differentiation	5	0.0417
					GO:0022008	neurogenesis	0.0033667	0.996838
					GO:0030154	cell differentiation	1.08956e-05	0.0184269
					GO:0045595	regulation of cell differentiation	0.00304157	0.994483
					GO:0048469	cell maturation	0.00304142	0.994481
					GO:0048699	generation of neurons	0.00704194	0.999994
A	GO:0009653	morphogenesis	4	0.0333
					GO:0009653	anatomical structure morphogenesis	0.00015534	0.232937
					GO:0022603	regulation of anatomical structure morphogenesis	0.00972241	1
					GO:0048514	blood vessel morphogenesis	0.00473585	0.999697
					GO:0048646	anatomical structure formation involved in morphogenesis	0.00440492	0.999466
A	GO:0006950	response to stress	3	0.025
					GO:0006950	response to stress	0.0019086	0.961654
					GO:0006979	response to oxidative stress	0.00631606	0.99998
					GO:0042060	wound healing	0.00560029	0.999931
A	GO:0000003	reproduction	1	0.0083
					GO:0046697	decidualization	0.00713453	0.999995
A	GO:0008283	cell proliferation	1	0.0083
					GO:0042127	regulation of cell proliferation	0.00153374	0.927205
A	GO:0009605	response to external stimulus	1	0.0083
					GO:0009605	response to external stimulus	0.00123612	0.878926
A	GO:0009719	response to endogenous stimulus	1	0.0083
					GO:0017015	regulation of transforming growth factor beta receptor signaling pathway	0.00239375	0.983278
A	GO:0006464	protein modification	1	0.0083
					GO:0045859	regulation of protein kinase activity	0.00941419	1
A	GO:0019538	protein metabolism	1	0.0083
					GO:0045859	regulation of protein kinase activity	0.00941419	1
