# Supplementary material for: Computational Promoter Modeling Identifies the Modes of Transcriptional Regulation in Hematopoietic Stem Cells
Source: PLoS One. 2014 Apr 7;9(4):e93853. doi: 10.1371/journal.pone.0093853 (PMC3977923; doi:10.1371/journal.pone.0093853)
Supplement: Table S13 — Result of log-linear model in Class B. (XLSX) [file pone.0093853.s018.xlsx]

## Sheet: S13
Factor	Ahr	Ahrr	Aire	Alx1	Ar	Arid5b	Arnt	Arnt2	Ascl1	Bach1	Bach2	Bcl6	Bhlhe40	Bhlhe41	Bptf	Cbfb	Cebpa	Cebpb	Cebpd	Cebpe	Cebpg	Cp2	Creb1	Crem	Crx	Cux1	Deaf1	Dmrt3	E2f1	E2f3	E2f4	E2f7	Ebf1	Ebf2	Ebf3	Egr1	Egr2	Egr3	Egr4	Elf1	Elf2	Elf4	Elk1	Elk3	Elk4	Ep300	Erg	Esr1	Ets1
Ahr	0	0.14	0	0	0	0	0.16	0.17	0.18	0.01	0.08	0	0.39	0.28	0	0	0	0.1	0.13	0.15	0.01	0.01	0	0	0	0	0	0	0	0.27	0.27	0.3	0	0.28	0	0	0.34	0.37	0	0	0.33	0.34	0.35	0.35	0.4	0	0.43	0	0.45
Ahrr	0.14	0	0	0	0	0.03	0.97	1	0.29	0.15	0.34	0	0.48	0.44	0	0	0.06	0.36	0.37	0.43	0.18	0.18	0.04	0.09	0.13	0	0	0	0.07	0.39	0.39	0.44	0.06	0.39	0.01	0	0.45	0.47	0.02	0	0.26	0.3	0.31	0.32	0.35	0	0.39	0	0.39
Aire	0	0	0	0	0	0	0	0	0	0	0	0	0	0	0	0	0	0	0	0	0	0	0	0	0	0	0	0	0	0	0	0	0	0	0	0	0	0	0	0	0	0	0	0	0	0	0	0	0
Alx1	0	0	0	0	0	0	0	0	0	0	0	0	0	0	0	0	0	0	0	0	0	0	0	0	0	0	0	0	0	0	0	0	0	0	0	0	0	0	0	0	0	0	0	0	0	0	0	0	0
Ar	0	0	0	0	0	0	0	0	0	0	0	0	0	0	0	0	0	0	0	0	0	0	0	0	0	0	0	0	0	0	0	0	0	0	0	0	0	0	0	0	0	0	0	0	0	0	0	0	0
Arid5b	0	0.03	0	0	0	0	0.22	0.25	0.17	0.04	0.06	0	0.13	0.17	0	0	0.01	0.07	0.1	0.12	0.04	0.03	0.01	0.01	0.02	0	0	0	0	0.12	0.14	0.18	0.02	0.44	0	0	0.24	0.27	0	0	0.44	0.46	0.48	0.51	0.53	0	0.53	0	0.57
Arnt	0.16	0.97	0	0	0	0.22	0	1	0.32	0.16	0.33	0	0.5	0.44	0	0	0.06	0.35	0.39	0.44	0.2	0.21	0.04	0.09	0.16	0	0	0	0.07	0.41	0.42	0.47	0.07	0.44	0.04	0	0.46	0.49	0.04	0	0.3	0.27	0.31	0.34	0.38	0	0.38	0	0.41
Arnt2	0.17	1	0	0	0	0.25	1	0	0.32	0.15	0.34	0	0.51	0.46	0	0.01	0.07	0.34	0.38	0.44	0.21	0.24	0.05	0.09	0.16	0	0	0	0.08	0.41	0.41	0.46	0.07	0.43	0.03	0	0.48	0.52	0.03	0	0.28	0.32	0.35	0.36	0.4	0	0.39	0	0.44
Ascl1	0.18	0.29	0	0	0	0.17	0.32	0.32	0	0.05	0.12	0	0.56	0.55	0	0	0.02	0.13	0.14	0.14	0.06	0.1	0.01	0.02	0.05	0	0	0	0.05	0.19	0.24	0.23	0.01	0.21	0	0	0.21	0.23	0.02	0	0.17	0.16	0.19	0.21	0.21	0	0.2	0	0.24
Bach1	0.01	0.15	0	0	0	0.04	0.16	0.15	0.05	0	0.16	0	0.15	0.12	0	0	0.02	0.31	0.31	0.37	0.03	0.04	0.01	0.01	0.01	0	0	0	0	0.22	0.22	0.25	0.01	0.22	0	0	0.19	0.2	0	0	0.34	0.36	0.4	0.39	0.42	0	0.45	0	0.47
Bach2	0.08	0.34	0	0	0	0.06	0.33	0.34	0.12	0.16	0	0	0.15	0.17	0	0.05	0	0.16	0.17	0.21	0.14	0.08	0.01	0.03	0.12	0	0	0	0	0.24	0.28	0.31	0.02	0.26	0	0	0.24	0.25	0	0	0.23	0.24	0.26	0.27	0.3	0	0.31	0	0.34
Bcl6	0	0	0	0	0	0	0	0	0	0	0	0	0	0	0	0	0	0	0	0	0	0	0	0	0	0	0	0	0	0	0	0	0	0	0	0	0	0	0	0	0	0	0	0	0	0	0	0	0
Bhlhe40	0.39	0.48	0	0	0	0.13	0.5	0.51	0.56	0.15	0.15	0	0	0.66	0	0	0.05	0.25	0.27	0.29	0.13	0.18	0.01	0.04	0.1	0	0	0	0.08	0.36	0.4	0.43	0.01	0.38	0	0	0.35	0.36	0.04	0	0.31	0.34	0.37	0.37	0.4	0	0.4	0	0.42
Bhlhe41	0.28	0.44	0	0	0	0.17	0.44	0.46	0.55	0.12	0.17	0	0.66	0	0	0	0.05	0.13	0.17	0.18	0.1	0.17	0.01	0.04	0.08	0	0	0	0.08	0.31	0.33	0.36	0.02	0.32	0.01	0	0.22	0.25	0.04	0	0.22	0.26	0.27	0.3	0.32	0	0.35	0	0.35
Bptf	0	0	0	0	0	0	0	0	0	0	0	0	0	0	0	0	0	0	0	0	0	0	0	0	0	0	0	0	0	0	0	0	0	0	0	0	0	0	0	0	0	0	0	0	0	0	0	0	0
Cbfb	0	0	0	0	0	0	0	0.01	0	0	0.05	0	0	0	0	0	0	0.01	0.02	0.05	0.01	0.02	0	0.01	0.01	0	0	0	0	0.19	0.24	0.23	0.01	0.11	0	0	0.11	0.13	0	0	0.11	0.12	0.13	0.14	0.17	0	0.2	0	0.21
Cebpa	0	0.06	0	0	0	0.01	0.06	0.07	0.02	0.02	0	0	0.05	0.05	0	0	0	0.06	0.08	0.09	0.02	0.02	0.01	0.35	0.01	0	0	0	0	0.42	0.44	0.45	0.01	0.1	0	0	0.25	0.28	0	0	0.15	0.15	0.18	0.2	0.2	0	0.22	0	0.23
Cebpb	0.1	0.36	0	0	0	0.07	0.35	0.34	0.13	0.31	0.16	0	0.25	0.13	0	0.01	0.06	0	0.96	1	0.02	0.12	0.01	0.07	0.06	0	0	0	0	0.22	0.24	0.28	0.02	0.48	0	0	0.23	0.26	0	0	0.18	0.21	0.22	0.25	0.24	0	0.29	0	0.3
Cebpd	0.13	0.37	0	0	0	0.1	0.39	0.38	0.14	0.31	0.17	0	0.27	0.17	0	0.02	0.08	0.96	0	1	0.02	0.11	0.01	0.07	0.06	0	0	0	0	0.22	0.25	0.28	0.02	0.53	0	0	0.27	0.26	0	0	0.18	0.23	0.22	0.24	0.28	0	0.29	0	0.29
Cebpe	0.15	0.43	0	0	0	0.12	0.44	0.44	0.14	0.37	0.21	0	0.29	0.18	0	0.05	0.09	1	1	0	0.02	0.12	0.01	0.06	0.06	0	0	0	0.01	0.23	0.25	0.28	0.02	0.55	0	0	0.26	0.3	0	0	0.21	0.22	0.23	0.26	0.28	0	0.31	0	0.32
Cebpg	0.01	0.18	0	0	0	0.04	0.2	0.21	0.06	0.03	0.14	0	0.13	0.1	0	0.01	0.02	0.02	0.02	0.02	0	0.04	0.01	0.02	0.01	0	0	0	0.01	0.16	0.19	0.2	0.16	0.19	0	0	0.31	0.33	0	0	0.21	0.24	0.27	0.28	0.28	0	0.32	0	0.36
Cp2	0.01	0.18	0	0	0	0.03	0.21	0.24	0.1	0.04	0.08	0	0.18	0.17	0	0.02	0.02	0.12	0.11	0.12	0.04	0	0.01	0.02	0.01	0	0	0	0	0.32	0.35	0.36	0.03	0.88	0.01	0	0.2	0.22	0	0	0.27	0.27	0.32	0.34	0.34	0	0.35	0	0.39
Creb1	0	0.04	0	0	0	0.01	0.04	0.05	0.01	0.01	0.01	0	0.01	0.01	0	0	0.01	0.01	0.01	0.01	0.01	0.01	0	0.01	0.01	0	0	0	0	0.28	0.3	0.3	0.01	0.36	0	0	0.06	0.09	0	0	0.05	0.07	0.06	0.08	0.12	0	0.14	0	0.12
Crem	0	0.09	0	0	0	0.01	0.09	0.09	0.02	0.01	0.03	0	0.04	0.04	0	0.01	0.35	0.07	0.07	0.06	0.02	0.02	0.01	0	0.01	0	0	0	0	0.09	0.13	0.16	0.02	0.41	0	0	0.31	0.31	0	0	0.2	0.2	0.23	0.24	0.23	0	0.29	0	0.28
Crx	0	0.13	0	0	0	0.02	0.16	0.16	0.05	0.01	0.12	0	0.1	0.08	0	0.01	0.01	0.06	0.06	0.06	0.01	0.01	0.01	0.01	0	0	0	0	0	0.05	0.08	0.1	0.01	0.37	0	0	0.33	0.37	0	0	0.19	0.21	0.22	0.22	0.25	0	0.25	0	0.28
Cux1	0	0	0	0	0	0	0	0	0	0	0	0	0	0	0	0	0	0	0	0	0	0	0	0	0	0	0	0	0	0	0	0	0	0	0	0	0	0	0	0	0	0	0	0	0	0	0	0	0
Deaf1	0	0	0	0	0	0	0	0	0	0	0	0	0	0	0	0	0	0	0	0	0	0	0	0	0	0	0	0	0	0	0	0	0	0	0	0	0	0	0	0	0	0	0	0	0	0	0	0	0
Dmrt3	0	0	0	0	0	0	0	0	0	0	0	0	0	0	0	0	0	0	0	0	0	0	0	0	0	0	0	0	0	0	0	0	0	0	0	0	0	0	0	0	0	0	0	0	0	0	0	0	0
E2f1	0	0.07	0	0	0	0	0.07	0.08	0.05	0	0	0	0.08	0.08	0	0	0	0	0	0.01	0.01	0	0	0	0	0	0	0	0	0.15	0.17	0.2	0.01	0.11	0	0	0.12	0.13	0	0	0.05	0.07	0.08	0.1	0.11	0	0.1	0	0.14
E2f3	0.27	0.39	0	0	0	0.12	0.41	0.41	0.19	0.22	0.24	0	0.36	0.31	0	0.19	0.42	0.22	0.22	0.23	0.16	0.32	0.28	0.09	0.05	0	0	0	0.15	0	0.95	1	0.09	0.62	0.02	0	0.47	0.49	0.03	0	0.4	0.41	0.44	0.47	0.49	0	0.53	0	0.52
E2f4	0.27	0.39	0	0	0	0.14	0.42	0.41	0.24	0.22	0.28	0	0.4	0.33	0	0.24	0.44	0.24	0.25	0.25	0.19	0.35	0.3	0.13	0.08	0	0	0	0.17	0.95	0	1	0.11	0.62	0.02	0	0.48	0.49	0.03	0	0.44	0.44	0.47	0.48	0.51	0	0.53	0	0.55
E2f7	0.3	0.44	0	0	0	0.18	0.47	0.46	0.23	0.25	0.31	0	0.43	0.36	0	0.23	0.45	0.28	0.28	0.28	0.2	0.36	0.3	0.16	0.1	0	0	0	0.2	1	1	0	0.09	0.65	0.02	0	0.48	0.53	0.04	0	0.46	0.47	0.48	0.48	0.53	0	0.56	0	0.57
Ebf1	0	0.06	0	0	0	0.02	0.07	0.07	0.01	0.01	0.02	0	0.01	0.02	0	0.01	0.01	0.02	0.02	0.02	0.16	0.03	0.01	0.02	0.01	0	0	0	0.01	0.09	0.11	0.09	0	0.31	0	0	0.08	0.11	0	0	0.24	0.26	0.25	0.28	0.3	0	0.31	0	0.33
Ebf2	0.28	0.39	0	0	0	0.44	0.44	0.43	0.21	0.22	0.26	0	0.38	0.32	0	0.11	0.1	0.48	0.53	0.55	0.19	0.88	0.36	0.41	0.37	0	0	0	0.11	0.62	0.62	0.65	0.31	0	0.01	0	0.43	0.46	0.01	0	0.42	0.42	0.43	0.47	0.49	0	0.53	0	0.54
Ebf3	0	0.01	0	0	0	0	0.04	0.03	0	0	0	0	0	0.01	0	0	0	0	0	0	0	0.01	0	0	0	0	0	0	0	0.02	0.02	0.02	0	0.01	0	0	0.14	0.17	0	0	0.16	0.18	0.18	0.18	0.22	0	0.22	0	0.23
Egr1	0	0	0	0	0	0	0	0	0	0	0	0	0	0	0	0	0	0	0	0	0	0	0	0	0	0	0	0	0	0	0	0	0	0	0	0	0	0	0	0	0	0	0	0	0	0	0	0	0
Egr2	0.34	0.45	0	0	0	0.24	0.46	0.48	0.21	0.19	0.24	0	0.35	0.22	0	0.11	0.25	0.23	0.27	0.26	0.31	0.2	0.06	0.31	0.33	0	0	0	0.12	0.47	0.48	0.48	0.08	0.43	0.14	0	0	1	0.01	0	0.29	0.33	0.33	0.36	0.37	0	0.42	0	0.42
Egr3	0.37	0.47	0	0	0	0.27	0.49	0.52	0.23	0.2	0.25	0	0.36	0.25	0	0.13	0.28	0.26	0.26	0.3	0.33	0.22	0.09	0.31	0.37	0	0	0	0.13	0.49	0.49	0.53	0.11	0.46	0.17	0	1	0	0.01	0	0.33	0.33	0.34	0.34	0.39	0	0.4	0	0.42
Egr4	0	0.02	0	0	0	0	0.04	0.03	0.02	0	0	0	0.04	0.04	0	0	0	0	0	0	0	0	0	0	0	0	0	0	0	0.03	0.03	0.04	0	0.01	0	0	0.01	0.01	0	0	0.04	0.05	0.06	0.07	0.09	0	0.08	0	0.1
Elf1	0	0	0	0	0	0	0	0	0	0	0	0	0	0	0	0	0	0	0	0	0	0	0	0	0	0	0	0	0	0	0	0	0	0	0	0	0	0	0	0	0	0	0	0	0	0	0	0	0
Elf2	0.33	0.26	0	0	0	0.44	0.3	0.28	0.17	0.34	0.23	0	0.31	0.22	0	0.11	0.15	0.18	0.18	0.21	0.21	0.27	0.05	0.2	0.19	0	0	0	0.05	0.4	0.44	0.46	0.24	0.42	0.16	0	0.29	0.33	0.04	0	0	0.76	0.77	0.78	0.81	0	0.84	0	0.86
Elf4	0.34	0.3	0	0	0	0.46	0.27	0.32	0.16	0.36	0.24	0	0.34	0.26	0	0.12	0.15	0.21	0.23	0.22	0.24	0.27	0.07	0.2	0.21	0	0	0	0.07	0.41	0.44	0.47	0.26	0.42	0.18	0	0.33	0.33	0.05	0	0.76	0	0.76	0.78	0.82	0	0.83	0	0.87
Elk1	0.35	0.31	0	0	0	0.48	0.31	0.35	0.19	0.4	0.26	0	0.37	0.27	0	0.13	0.18	0.22	0.22	0.23	0.27	0.32	0.06	0.23	0.22	0	0	0	0.08	0.44	0.47	0.48	0.25	0.43	0.18	0	0.33	0.34	0.06	0	0.77	0.76	0	0.79	0.82	0	0.82	0	0.86
Elk3	0.35	0.32	0	0	0	0.51	0.34	0.36	0.21	0.39	0.27	0	0.37	0.3	0	0.14	0.2	0.25	0.24	0.26	0.28	0.34	0.08	0.24	0.22	0	0	0	0.1	0.47	0.48	0.48	0.28	0.47	0.18	0	0.36	0.34	0.07	0	0.78	0.78	0.79	0	0.8	0	0.84	0	0.86
Elk4	0.4	0.35	0	0	0	0.53	0.38	0.4	0.21	0.42	0.3	0	0.4	0.32	0	0.17	0.2	0.24	0.28	0.28	0.28	0.34	0.12	0.23	0.25	0	0	0	0.11	0.49	0.51	0.53	0.3	0.49	0.22	0	0.37	0.39	0.09	0	0.81	0.82	0.82	0.8	0	0	0.83	0	0.85
Ep300	0	0	0	0	0	0	0	0	0	0	0	0	0	0	0	0	0	0	0	0	0	0	0	0	0	0	0	0	0	0	0	0	0	0	0	0	0	0	0	0	0	0	0	0	0	0	0	0	0
Erg	0.43	0.39	0	0	0	0.53	0.38	0.39	0.2	0.45	0.31	0	0.4	0.35	0	0.2	0.22	0.29	0.29	0.31	0.32	0.35	0.14	0.29	0.25	0	0	0	0.1	0.53	0.53	0.56	0.31	0.53	0.22	0	0.42	0.4	0.08	0	0.84	0.83	0.82	0.84	0.83	0	0	0	0.86
Esr1	0	0	0	0	0	0	0	0	0	0	0	0	0	0	0	0	0	0	0	0	0	0	0	0	0	0	0	0	0	0	0	0	0	0	0	0	0	0	0	0	0	0	0	0	0	0	0	0	0
Ets1	0.45	0.39	0	0	0	0.57	0.41	0.44	0.24	0.47	0.34	0	0.42	0.35	0	0.21	0.23	0.3	0.29	0.32	0.36	0.39	0.12	0.28	0.28	0	0	0	0.14	0.52	0.55	0.57	0.33	0.54	0.23	0	0.42	0.42	0.1	0	0.86	0.87	0.86	0.86	0.85	0	0.86	0	0
Ets2	0.46	0.42	0	0	0	0.58	0.43	0.43	0.27	0.48	0.37	0	0.45	0.38	0	0.22	0.26	0.34	0.34	0.35	0.36	0.38	0.14	0.33	0.32	0	0	0	0.14	0.55	0.58	0.59	0.34	0.57	0.24	0	0.43	0.47	0.11	0	0.89	0.9	0.88	0.9	0.88	0	0.89	0	0.88
Etv4	0.49	0.45	0	0	0	0.62	0.45	0.45	0.25	0.49	0.38	0	0.5	0.4	0	0.24	0.27	0.34	0.36	0.4	0.37	0.43	0.17	0.31	0.33	0	0	0	0.15	0.59	0.6	0.63	0.37	0.6	0.25	0	0.48	0.47	0.13	0	0.92	0.91	0.91	0.92	0.9	0	0.91	0	0.92
Etv6	0.5	0.42	0	0	0	0.66	0.49	0.5	0.28	0.53	0.41	0	0.49	0.41	0	0.26	0.28	0.37	0.36	0.37	0.4	0.45	0.18	0.33	0.33	0	0	0	0.19	0.6	0.62	0.65	0.37	0.6	0.27	0	0.47	0.51	0.14	0	0.93	0.94	0.93	0.95	0.94	0	0.93	0	0.94
Fli1	0.53	0.5	0	0	0	0.67	0.48	0.5	0.3	0.54	0.41	0	0.54	0.44	0	0.28	0.32	0.38	0.39	0.4	0.42	0.46	0.17	0.36	0.34	0	0	0	0.16	0.63	0.64	0.67	0.4	0.62	0.28	0	0.5	0.52	0.14	0	0.97	0.97	0.97	0.97	0.97	0	0.97	0	0.97
Fos	0	0.03	0	0	0	0	0.04	0.04	0.01	0	0	0	0.01	0.01	0	0.01	0.01	0.01	0.01	0.01	0.01	0.01	0	0.01	0.01	0	0	0	0	0.04	0.04	0.05	0.01	0.03	0.01	0	0.03	0.04	0	0	0.01	0.02	0.01	0.02	0.02	0	0.02	0	0.02
Fosb	0.21	0.31	0	0	0	0.13	0.34	0.34	0.2	0.28	0.67	0	0.31	0.21	0	0.21	0.14	0.24	0.21	0.24	0.18	0.21	0.21	0.19	0.37	0	0	0	0.06	0.45	0.43	0.46	0.04	0.39	0.1	0	0.35	0.36	0.04	0	0.49	0.5	0.5	0.54	0.56	0	0.57	0	0.6
Fosl1	0.25	0.34	0	0	0	0.16	0.35	0.36	0.21	0.3	0.72	0	0.32	0.21	0	0.22	0.14	0.22	0.24	0.26	0.2	0.23	0.21	0.2	0.4	0	0	0	0.06	0.44	0.45	0.48	0.06	0.42	0.11	0	0.35	0.37	0.04	0	0.49	0.51	0.54	0.56	0.54	0	0.59	0	0.62
Fosl2	0.25	0.36	0	0	0	0.18	0.4	0.36	0.21	0.33	0.74	0	0.37	0.25	0	0.24	0.16	0.28	0.26	0.28	0.22	0.25	0.23	0.21	0.41	0	0	0	0.07	0.46	0.47	0.49	0.07	0.45	0.13	0	0.37	0.4	0.07	0	0.53	0.56	0.56	0.57	0.61	0	0.61	0	0.64
Foxa1	0	0	0	0	0	0	0	0	0	0	0	0	0	0	0	0	0	0	0	0	0	0	0	0	0	0	0	0	0	0	0	0	0	0	0	0	0	0	0	0	0	0	0	0	0	0	0	0	0
Foxa2	0	0	0	0	0	0	0	0	0	0	0	0	0	0	0	0	0	0	0	0	0	0	0	0	0	0	0	0	0	0	0	0	0	0	0	0	0	0	0	0	0	0	0	0	0	0	0	0	0
Foxj2	0	0	0	0	0	0	0	0	0	0	0	0	0	0	0	0	0	0	0	0	0	0	0	0	0	0	0	0	0	0	0	0	0	0	0	0	0	0	0	0	0	0	0	0	0	0	0	0	0
Foxp1	0	0	0	0	0	0	0	0	0	0	0	0	0	0	0	0	0	0	0	0	0	0	0	0	0	0	0	0	0	0	0	0	0	0	0	0	0	0	0	0	0	0	0	0	0	0	0	0	0
Gabpa	0.33	0.46	0	0	0	0.73	0.48	0.45	0.25	0.39	0.34	0	0.46	0.39	0	0.23	0.23	0.26	0.28	0.3	0.39	0.42	0.09	0.32	0.27	0	0	0	0.08	0.53	0.56	0.59	0.41	0.6	0.27	0	0.46	0.49	0.05	0	0.75	0.77	0.78	0.8	0.83	0	0.83	0	0.86
Gabpb1	0.37	0.43	0	0	0	0.72	0.45	0.47	0.24	0.41	0.33	0	0.46	0.39	0	0.24	0.26	0.27	0.3	0.31	0.41	0.42	0.1	0.32	0.24	0	0	0	0.09	0.59	0.6	0.62	0.44	0.58	0.28	0	0.41	0.43	0.07	0	0.75	0.76	0.79	0.79	0.83	0	0.83	0	0.84
Gata1	0	0.04	0	0	0	0.02	0.05	0.06	0.01	0.02	0.03	0	0.01	0.02	0	0.02	0.02	0.07	0.07	0.08	0.01	0.02	0.02	0.02	0.01	0	0	0	0.01	0.06	0.07	0.06	0.02	0.08	0.01	0	0.09	0.07	0.01	0	0.03	0.03	0.02	0.02	0.03	0	0.03	0	0.03
Gata2	0.06	0.43	0	0	0	0.07	0.42	0.44	0.18	0.45	0.31	0	0.23	0.21	0	0.02	0.27	0.27	0.28	0.3	0.1	0.37	0.07	0.22	0.11	0	0	0	0.36	0.41	0.43	0.43	0.14	0.39	0.02	0	0.35	0.38	0.03	0	0.29	0.28	0.3	0.31	0.31	0	0.32	0	0.34
Gata3	0.01	0.11	0	0	0	0.04	0.13	0.15	0.06	0.03	0.02	0	0.14	0.15	0	0.03	0.03	0.02	0.03	0.03	0.03	0.05	0.31	0.04	0.02	0	0	0	0.02	0.24	0.23	0.21	0.04	0.29	0.02	0	0.17	0.18	0.02	0	0.17	0.19	0.17	0.2	0.18	0	0.2	0	0.22
Gata6	0	0	0	0	0	0	0	0	0	0	0	0	0	0	0	0	0	0	0	0	0	0	0	0	0	0	0	0	0	0	0	0	0	0	0	0	0	0	0	0	0	0	0	0	0	0	0	0	0
Gfi1	0	0	0	0	0	0	0	0	0	0	0	0	0	0	0	0	0	0	0	0	0	0	0	0	0	0	0	0	0	0	0	0	0	0	0	0	0	0	0	0	0	0	0	0	0	0	0	0	0
Gfi1b	0	0	0	0	0	0	0.01	0.02	0	0	0	0	0.01	0.01	0	0	0.01	0.04	0.04	0.05	0	0.01	0	0	0	0	0	0	0	0.02	0.02	0.02	0	0.03	0	0	0.02	0.03	0	0	0.01	0.01	0.01	0.01	0.01	0	0.01	0	0.01
Gli1	0	0	0	0	0	0	0	0	0	0	0	0	0	0	0	0	0	0	0	0	0	0	0	0	0	0	0	0	0	0	0	0	0	0	0	0	0	0	0	0	0	0	0	0	0	0	0	0	0
Gli2	0.14	0.41	0	0	0	0.13	0.44	0.45	0.2	0.15	0.21	0	0.38	0.32	0	0.05	0.12	0.21	0.21	0.22	0.13	0.44	0.08	0.1	0.08	0	0	0	0.07	0.33	0.35	0.36	0.12	0.41	0.05	0	0.42	0.45	0.22	0	0.27	0.28	0.27	0.3	0.31	0	0.32	0	0.33
Gli3	0.15	0.47	0	0	0	0.16	0.47	0.46	0.23	0.14	0.23	0	0.43	0.35	0	0.07	0.11	0.23	0.23	0.24	0.15	0.46	0.1	0.11	0.11	0	0	0	0.08	0.38	0.38	0.4	0.11	0.42	0.05	0	0.45	0.46	0.24	0	0.29	0.32	0.31	0.3	0.33	0	0.33	0	0.35
Glis1	0	0	0	0	0	0	0	0	0	0	0	0	0	0	0	0	0	0	0	0	0	0	0	0	0	0	0	0	0	0	0	0	0	0	0	0	0	0	0	0	0	0	0	0	0	0	0	0	0
Hand1	0.22	0.32	0	0	0	0.2	0.33	0.33	0.58	0.1	0.17	0	0.59	0.56	0	0.02	0.06	0.15	0.17	0.16	0.12	0.16	0.1	0.06	0.07	0	0	0	0.18	0.26	0.26	0.29	0.07	0.24	0.03	0	0.27	0.25	0.12	0	0.19	0.18	0.22	0.21	0.2	0	0.21	0	0.24
Hand2	0.21	0.33	0	0	0	0.19	0.33	0.35	0.58	0.1	0.16	0	0.6	0.6	0	0.03	0.08	0.17	0.17	0.18	0.12	0.17	0.11	0.08	0.09	0	0	0	0.17	0.28	0.25	0.28	0.07	0.26	0.04	0	0.25	0.27	0.11	0	0.2	0.19	0.2	0.22	0.22	0	0.24	0	0.23
Hic1	0	0	0	0	0	0	0	0	0	0	0	0	0	0	0	0	0	0	0	0	0	0	0	0	0	0	0	0	0	0	0	0	0	0	0	0	0	0	0	0	0	0	0	0	0	0	0	0	0
Hif1a	0	0	0	0	0	0	0.01	0.02	0	0	0.03	0	0	0.01	0	0	0	0	0	0.01	0.01	0.01	0	0	0	0	0	0	0	0.02	0.02	0.03	0	0.02	0	0	0.03	0.03	0	0	0.01	0.02	0.01	0.02	0.02	0	0.02	0	0.01
Hlf	0	0	0	0	0	0	0	0	0	0	0	0	0	0	0	0	0	0	0	0	0	0	0	0	0	0	0	0	0	0	0	0	0	0	0	0	0	0	0	0	0	0	0	0	0	0	0	0	0
Hltf	0	0	0	0	0	0	0	0	0	0	0	0	0	0	0	0	0	0	0	0	0	0	0	0	0	0	0	0	0	0	0	0	0	0	0	0	0	0	0	0	0	0	0	0	0	0	0	0	0
Hnf1a	0	0	0	0	0	0	0.01	0.02	0.03	0	0	0	0.05	0.06	0	0	0	0	0.01	0.01	0	0.01	0	0.01	0	0	0	0	0	0.04	0.04	0.05	0	0.05	0	0	0.02	0.02	0	0	0.01	0.01	0.01	0.01	0.01	0	0.01	0	0.02
Hnf1b	0	0.07	0	0	0	0.01	0.08	0.08	0.05	0.01	0.15	0	0.09	0.09	0	0.02	0.01	0.07	0.07	0.06	0.01	0.01	0.01	0.01	0.01	0	0	0	0.01	0.13	0.13	0.14	0.01	0.1	0.01	0	0.12	0.11	0.01	0	0.08	0.07	0.07	0.08	0.09	0	0.09	0	0.09
Hnf4a	0	0.01	0	0	0	0	0.03	0.03	0.01	0	0	0	0.01	0.01	0	0	0	0.01	0	0	0.01	0.01	0	0	0	0	0	0	0	0.02	0.02	0.02	0	0.03	0.01	0	0.04	0.03	0.01	0	0.02	0.03	0.02	0.03	0.03	0	0.03	0	0.04
Hnf4g	0.27	0.38	0	0	0	0.3	0.4	0.4	0.21	0.3	0.2	0	0.35	0.3	0	0.12	0.24	0.23	0.26	0.27	0.26	0.43	0.34	0.27	0.25	0	0	0	0.13	0.45	0.44	0.51	0.12	0.45	0.24	0	0.51	0.54	0.08	0	0.29	0.3	0.32	0.33	0.32	0	0.33	0	0.38
Hoxa5	0	0	0	0	0	0	0	0	0	0	0	0	0	0	0	0	0	0	0	0	0	0	0	0	0	0	0	0	0	0	0	0	0	0	0	0	0	0	0	0	0	0	0	0	0	0	0	0	0
Hoxa7	0	0	0	0	0	0	0	0	0	0	0	0	0	0	0	0	0	0	0	0	0	0	0	0	0	0	0	0	0	0	0	0	0	0	0	0	0	0	0	0	0	0	0	0	0	0	0	0	0
Hoxa9	0.01	0.04	0	0	0	0.03	0.05	0.05	0.11	0.02	0.01	0	0.23	0.18	0	0.02	0.02	0.02	0.02	0.02	0.03	0.02	0.02	0.01	0.02	0	0	0	0.01	0.2	0.22	0.21	0.03	0.2	0.02	0	0.25	0.26	0.01	0	0.2	0.21	0.22	0.2	0.2	0	0.22	0	0.23
Hsf1	0	0	0	0	0	0	0	0	0	0	0	0	0	0	0	0	0	0	0	0	0	0	0	0	0	0	0	0	0	0	0	0	0	0	0	0	0	0	0	0	0	0	0	0	0	0	0	0	0
Ikzf1	0	0	0	0	0	0	0	0	0	0	0	0	0	0	0	0	0	0	0	0	0	0	0	0	0	0	0	0	0	0	0	0	0	0	0	0	0	0	0	0	0	0	0	0	0	0	0	0	0
Irf1	0	0.03	0	0	0	0.01	0.06	0.05	0.01	0	0	0	0.01	0.01	0	0.01	0.01	0.01	0.01	0.01	0.01	0.01	0.01	0.01	0.01	0	0	0	0	0.05	0.06	0.05	0.01	0.06	0.01	0	0.07	0.08	0.01	0	0.03	0.03	0.03	0.03	0.03	0	0.03	0	0.03
Irf2	0.14	0.42	0	0	0	0.07	0.43	0.43	0.16	0.16	0.19	0	0.3	0.25	0	0.25	0.26	0.23	0.25	0.23	0.19	0.28	0.3	0.19	0.19	0	0	0	0.22	0.34	0.38	0.39	0.13	0.38	0.06	0	0.35	0.35	0.07	0	0.27	0.27	0.29	0.3	0.31	0	0.29	0	0.34
Irf3	0.16	0.42	0	0	0	0.08	0.44	0.46	0.17	0.18	0.2	0	0.32	0.26	0	0.25	0.29	0.27	0.26	0.29	0.2	0.3	0.3	0.2	0.2	0	0	0	0.26	0.37	0.39	0.41	0.14	0.4	0.07	0	0.38	0.41	0.07	0	0.27	0.29	0.3	0.32	0.33	0	0.33	0	0.35
Irf4	0.16	0.44	0	0	0	0.09	0.47	0.5	0.16	0.18	0.19	0	0.32	0.28	0	0.29	0.3	0.28	0.28	0.28	0.23	0.31	0.34	0.2	0.22	0	0	0	0.27	0.41	0.42	0.43	0.18	0.42	0.09	0	0.37	0.4	0.07	0	0.3	0.32	0.3	0.33	0.36	0	0.35	0	0.37
Irf5	0.18	0.47	0	0	0	0.12	0.48	0.51	0.17	0.2	0.21	0	0.36	0.29	0	0.27	0.32	0.27	0.31	0.31	0.23	0.35	0.34	0.21	0.21	0	0	0	0.29	0.42	0.42	0.44	0.18	0.4	0.09	0	0.42	0.43	0.07	0	0.31	0.34	0.34	0.37	0.39	0	0.38	0	0.4
Irf6	0.18	0.5	0	0	0	0.12	0.53	0.53	0.18	0.2	0.22	0	0.37	0.3	0	0.29	0.36	0.32	0.32	0.36	0.23	0.36	0.35	0.23	0.23	0	0	0	0.28	0.45	0.47	0.47	0.19	0.44	0.1	0	0.43	0.45	0.09	0	0.32	0.33	0.38	0.36	0.37	0	0.4	0	0.42
Irf7	0.21	0.52	0	0	0	0.12	0.52	0.55	0.23	0.22	0.23	0	0.4	0.32	0	0.33	0.36	0.32	0.35	0.35	0.25	0.38	0.36	0.25	0.26	0	0	0	0.31	0.45	0.47	0.49	0.2	0.47	0.1	0	0.44	0.44	0.1	0	0.37	0.37	0.39	0.39	0.43	0	0.43	0	0.44
Irf8	0	0.05	0	0	0	0.01	0.06	0.05	0.01	0.02	0.05	0	0.01	0.01	0	0.02	0.01	0.01	0.01	0.01	0.01	0.01	0.02	0.01	0.01	0	0	0	0.01	0.1	0.09	0.1	0.02	0.06	0.01	0	0.07	0.07	0.01	0	0.05	0.04	0.05	0.05	0.06	0	0.05	0	0.05
Jun	0.27	0.38	0	0	0	0.19	0.4	0.42	0.25	0.34	0.74	0	0.39	0.27	0	0.27	0.18	0.27	0.3	0.29	0.25	0.26	0.25	0.23	0.44	0	0	0	0.08	0.51	0.49	0.5	0.09	0.45	0.13	0	0.41	0.43	0.07	0	0.57	0.57	0.59	0.58	0.61	0	0.62	0	0.66
Junb	0.29	0.38	0	0	0	0.17	0.4	0.43	0.27	0.38	0.77	0	0.39	0.29	0	0.28	0.2	0.29	0.29	0.33	0.27	0.29	0.29	0.26	0.42	0	0	0	0.09	0.51	0.52	0.53	0.1	0.48	0.15	0	0.44	0.43	0.07	0	0.56	0.59	0.61	0.62	0.66	0	0.66	0	0.69
Jund	0	0.01	0	0	0	0.01	0.02	0.02	0.01	0.01	0.01	0	0.01	0.01	0	0.01	0.01	0.02	0.01	0.01	0.01	0.02	0.01	0.01	0.01	0	0	0	0.01	0.06	0.06	0.06	0.01	0.07	0.01	0	0.06	0.06	0.01	0	0.04	0.04	0.04	0.03	0.04	0	0.04	0	0.05
Lef1	0	0	0	0	0	0	0.03	0.02	0	0	0	0	0	0.01	0	0	0	0.01	0.01	0	0.01	0.01	0	0	0	0	0	0	0.01	0.03	0.02	0.03	0	0.04	0	0	0.03	0.03	0.01	0	0.02	0.02	0.02	0.02	0.02	0	0.02	0	0.02
Lhx3	0	0	0	0	0	0	0	0	0	0	0	0	0	0	0	0	0	0	0	0	0	0	0	0	0	0	0	0	0	0	0	0	0	0	0	0	0	0	0	0	0	0	0	0	0	0	0	0	0
Lmo2	0	0	0	0	0	0	0	0	0	0	0	0	0	0	0	0	0	0	0	0	0	0	0	0	0	0	0	0	0	0	0	0	0	0	0	0	0	0	0	0	0	0	0	0	0	0	0	0	0
Maf	0.12	0.34	0	0	0	0.08	0.35	0.38	0.13	0.17	0.78	0	0.18	0.16	0	0.33	0.05	0.16	0.16	0.18	0.24	0.14	0.04	0.1	0.21	0	0	0	0.02	0.29	0.29	0.31	0.07	0.27	0.02	0	0.28	0.28	0.01	0	0.25	0.23	0.24	0.26	0.26	0	0.27	0	0.28
Mafb	0.13	0.38	0	0	0	0.1	0.38	0.4	0.18	0.17	0.83	0	0.19	0.18	0	0.34	0.06	0.18	0.19	0.19	0.28	0.15	0.04	0.15	0.19	0	0	0	0.02	0.32	0.33	0.34	0.06	0.29	0.02	0	0.29	0.32	0.02	0	0.25	0.26	0.27	0.28	0.29	0	0.31	0	0.3
Maff	0.13	0.38	0	0	0	0.1	0.4	0.41	0.16	0.18	0.84	0	0.2	0.19	0	0.37	0.06	0.19	0.19	0.2	0.29	0.17	0.05	0.12	0.22	0	0	0	0.03	0.32	0.33	0.37	0.07	0.32	0.02	0	0.31	0.31	0.02	0	0.25	0.28	0.27	0.29	0.32	0	0.31	0	0.3
Mafg	0.16	0.4	0	0	0	0.11	0.41	0.45	0.18	0.19	0.89	0	0.21	0.19	0	0.38	0.08	0.2	0.24	0.22	0.3	0.18	0.05	0.12	0.23	0	0	0	0.03	0.35	0.34	0.37	0.09	0.34	0.03	0	0.33	0.34	0.02	0	0.28	0.27	0.31	0.31	0.32	0	0.33	0	0.33
Mafk	0.18	0.43	0	0	0	0.11	0.43	0.45	0.2	0.21	0.91	0	0.22	0.21	0	0.42	0.08	0.21	0.25	0.26	0.31	0.18	0.06	0.15	0.24	0	0	0	0.04	0.38	0.36	0.38	0.09	0.34	0.04	0	0.34	0.36	0.03	0	0.31	0.28	0.33	0.33	0.34	0	0.32	0	0.36
Max	0.25	0.37	0	0	0	0.19	0.36	0.4	0.63	0.12	0.17	0	0.62	0.63	0	0.04	0.09	0.18	0.18	0.2	0.13	0.16	0.12	0.07	0.1	0	0	0	0.2	0.27	0.26	0.29	0.09	0.27	0.05	0	0.28	0.27	0.12	0	0.22	0.22	0.22	0.22	0.24	0	0.25	0	0.24
Maz	0	0	0	0	0	0	0	0	0	0	0	0	0	0	0	0	0	0	0	0	0	0	0	0	0	0	0	0	0	0	0	0	0	0	0	0	0	0	0	0	0	0	0	0	0	0	0	0	0
Mecom	0	0	0	0	0	0	0	0	0	0	0	0	0	0	0	0	0	0	0	0	0	0	0	0	0	0	0	0	0	0	0	0	0	0	0	0	0	0	0	0	0	0	0	0	0	0	0	0	0
Mef2a	0	0	0	0	0	0	0	0	0	0	0	0	0	0	0	0	0	0	0	0	0	0	0	0	0	0	0	0	0	0	0	0	0	0	0	0	0	0	0	0	0	0	0	0	0	0	0	0	0
Meis1	0.01	0.09	0	0	0	0.03	0.11	0.11	0.03	0.02	0.05	0	0.05	0.06	0	0.03	0.03	0.11	0.1	0.11	0.03	0.03	0.03	0.03	0.02	0	0	0	0.02	0.13	0.16	0.16	0.04	0.17	0.03	0	0.08	0.08	0.02	0	0.11	0.11	0.1	0.11	0.11	0	0.12	0	0.12
Mitf	0.24	0.35	0	0	0	0.22	0.4	0.38	0.65	0.12	0.19	0	0.64	0.65	0	0.05	0.09	0.19	0.2	0.21	0.14	0.17	0.15	0.08	0.11	0	0	0	0.2	0.28	0.3	0.31	0.11	0.28	0.05	0	0.27	0.29	0.14	0	0.23	0.21	0.23	0.25	0.26	0	0.28	0	0.28
Mtf1	0	0	0	0	0	0	0	0	0	0	0	0	0	0	0	0	0	0	0	0	0	0	0	0	0	0	0	0	0	0	0	0	0	0	0	0	0	0	0	0	0	0	0	0	0	0	0	0	0
Mxd1	0.27	0.36	0	0	0	0.26	0.4	0.41	0.67	0.12	0.19	0	0.65	0.67	0	0.05	0.1	0.19	0.2	0.2	0.15	0.17	0.14	0.07	0.1	0	0	0	0.21	0.31	0.3	0.31	0.1	0.29	0.06	0	0.29	0.29	0.13	0	0.24	0.24	0.24	0.25	0.27	0	0.26	0	0.28
Mxd3	0.27	0.39	0	0	0	0.24	0.4	0.42	0.68	0.13	0.21	0	0.68	0.67	0	0.05	0.1	0.22	0.23	0.21	0.16	0.21	0.14	0.08	0.11	0	0	0	0.21	0.32	0.32	0.32	0.11	0.29	0.06	0	0.3	0.32	0.13	0	0.25	0.26	0.26	0.29	0.26	0	0.3	0	0.29
Mxd4	0.29	0.43	0	0	0	0.25	0.43	0.45	0.69	0.15	0.23	0	0.7	0.69	0	0.05	0.12	0.23	0.22	0.25	0.17	0.19	0.15	0.11	0.11	0	0	0	0.23	0.34	0.34	0.34	0.1	0.32	0.05	0	0.33	0.34	0.15	0	0.26	0.27	0.28	0.28	0.28	0	0.29	0	0.32
Mxi1	0.31	0.47	0	0	0	0.28	0.46	0.47	0.72	0.15	0.23	0	0.73	0.75	0	0.05	0.11	0.23	0.24	0.27	0.17	0.23	0.15	0.1	0.14	0	0	0	0.22	0.34	0.36	0.37	0.12	0.34	0.06	0	0.34	0.36	0.16	0	0.27	0.27	0.3	0.29	0.3	0	0.31	0	0.33
Myb	0	0	0	0	0	0	0	0	0	0	0	0	0	0	0	0	0	0	0	0	0	0	0	0	0	0	0	0	0	0	0	0	0	0	0	0	0	0	0	0	0	0	0	0	0	0	0	0	0
Myc	0.31	0.47	0	0	0	0.29	0.51	0.5	0.76	0.15	0.25	0	0.75	0.77	0	0.05	0.11	0.26	0.26	0.27	0.2	0.23	0.16	0.11	0.14	0	0	0	0.25	0.35	0.37	0.38	0.13	0.34	0.07	0	0.36	0.37	0.16	0	0.27	0.29	0.32	0.31	0.34	0	0.34	0	0.35
Mycn	0.31	0.48	0	0	0	0.28	0.49	0.48	0.78	0.16	0.26	0	0.78	0.79	0	0.06	0.11	0.29	0.28	0.28	0.19	0.24	0.17	0.11	0.14	0	0	0	0.29	0.36	0.38	0.39	0.13	0.37	0.09	0	0.38	0.38	0.18	0	0.3	0.31	0.33	0.33	0.34	0	0.33	0	0.34
Myf5	0.35	0.49	0	0	0	0.34	0.51	0.51	0.81	0.18	0.27	0	0.8	0.81	0	0.06	0.14	0.29	0.29	0.3	0.21	0.25	0.17	0.12	0.16	0	0	0	0.29	0.4	0.39	0.4	0.14	0.39	0.07	0	0.41	0.4	0.17	0	0.31	0.33	0.34	0.35	0.34	0	0.36	0	0.37
Myf6	0.37	0.53	0	0	0	0.32	0.53	0.54	0.83	0.19	0.29	0	0.83	0.82	0	0.07	0.13	0.3	0.3	0.33	0.21	0.27	0.2	0.12	0.17	0	0	0	0.28	0.4	0.4	0.46	0.15	0.4	0.08	0	0.4	0.41	0.18	0	0.33	0.34	0.33	0.36	0.37	0	0.36	0	0.38
Myod1	0.5	0.52	0	0	0	0.12	0.56	0.55	0.54	0.16	0.38	0	0.75	0.7	0	0.03	0.15	0.31	0.3	0.34	0.25	0.33	0.09	0.11	0.18	0	0	0	0.37	0.5	0.51	0.54	0.05	0.46	0.02	0	0.42	0.46	0.22	0	0.37	0.37	0.41	0.39	0.41	0	0.43	0	0.44
Myog	0.51	0.55	0	0	0	0.14	0.58	0.57	0.55	0.17	0.42	0	0.79	0.71	0	0.02	0.16	0.31	0.34	0.35	0.28	0.37	0.08	0.14	0.18	0	0	0	0.41	0.52	0.53	0.56	0.05	0.49	0.02	0	0.47	0.47	0.26	0	0.39	0.39	0.39	0.42	0.43	0	0.45	0	0.48
Nf1	0.04	0.42	0	0	0	0.09	0.45	0.45	0.14	0.09	0.07	0	0.23	0.22	0	0.06	0.07	0.09	0.09	0.09	0.09	0.12	0.07	0.06	0.05	0	0	0	0.05	0.34	0.37	0.38	0.08	0.26	0.06	0	0.3	0.31	0.04	0	0.2	0.21	0.22	0.22	0.23	0	0.24	0	0.23
Nfatc1	0	0	0	0	0	0	0	0	0	0	0	0	0	0	0	0	0	0	0	0	0	0	0	0	0	0	0	0	0	0	0	0	0	0	0	0	0	0	0	0	0	0	0	0	0	0	0	0	0
Nfatc2	0.05	0.31	0	0	0	0.11	0.33	0.32	0.15	0.16	0.09	0	0.31	0.18	0	0.05	0.06	0.12	0.13	0.13	0.14	0.18	0.07	0.07	0.05	0	0	0	0.06	0.32	0.34	0.36	0.11	0.37	0.04	0	0.38	0.41	0.06	0	0.22	0.25	0.25	0.26	0.27	0	0.28	0	0.29
Nfatc3	0.05	0.33	0	0	0	0.11	0.34	0.34	0.17	0.2	0.11	0	0.35	0.2	0	0.06	0.07	0.15	0.16	0.16	0.14	0.18	0.07	0.07	0.06	0	0	0	0.08	0.36	0.38	0.37	0.11	0.4	0.05	0	0.41	0.42	0.05	0	0.24	0.24	0.27	0.26	0.29	0	0.31	0	0.29
Nfatc4	0	0	0	0	0	0	0	0	0	0	0	0	0	0	0	0	0	0	0	0	0	0	0	0	0	0	0	0	0	0	0	0	0	0	0	0	0	0	0	0	0	0	0	0	0	0	0	0	0
Nfe2	0.16	0.43	0	0	0	0.14	0.46	0.48	0.21	0.24	0.95	0	0.24	0.22	0	0.44	0.08	0.26	0.27	0.27	0.33	0.18	0.07	0.15	0.26	0	0	0	0.06	0.39	0.38	0.41	0.12	0.35	0.04	0	0.36	0.37	0.04	0	0.28	0.32	0.35	0.34	0.34	0	0.39	0	0.39
Nfe2l1	0.19	0.47	0	0	0	0.13	0.48	0.5	0.23	0.24	0.96	0	0.27	0.26	0	0.46	0.09	0.28	0.26	0.26	0.37	0.2	0.08	0.16	0.28	0	0	0	0.05	0.4	0.43	0.41	0.11	0.37	0.04	0	0.37	0.39	0.03	0	0.34	0.33	0.36	0.38	0.36	0	0.4	0	0.4
Nfe2l2	0.19	0.53	0	0	0	0.14	0.5	0.52	0.21	0.24	1	0	0.26	0.26	0	0.47	0.08	0.29	0.3	0.31	0.33	0.22	0.08	0.17	0.29	0	0	0	0.06	0.42	0.43	0.45	0.12	0.39	0.05	0	0.38	0.39	0.04	0	0.35	0.37	0.39	0.38	0.41	0	0.4	0	0.42
Nfe2l3	0.01	0.24	0	0	0	0.03	0.27	0.26	0.1	0.04	0.02	0	0.19	0.15	0	0.03	0.03	0.03	0.04	0.04	0.05	0.06	0.03	0.03	0.02	0	0	0	0.22	0.12	0.15	0.17	0.04	0.12	0.03	0	0.16	0.18	0.03	0	0.09	0.08	0.08	0.09	0.1	0	0.09	0	0.08
Nfia	0	0.06	0	0	0	0.01	0.06	0.07	0.03	0	0.02	0	0.06	0.04	0	0	0.01	0.04	0.04	0.04	0.01	0.01	0.01	0	0.01	0	0	0	0.01	0.05	0.04	0.06	0.01	0.09	0.01	0	0.04	0.05	0.01	0	0.04	0.05	0.04	0.05	0.06	0	0.05	0	0.05
Nfib	0	0.03	0	0	0	0.01	0.04	0.05	0.03	0.01	0.02	0	0.04	0.04	0	0	0.02	0.07	0.08	0.07	0.01	0.01	0.01	0.01	0.01	0	0	0	0.01	0.09	0.08	0.09	0.01	0.05	0.01	0	0.05	0.04	0.01	0	0.04	0.04	0.04	0.05	0.05	0	0.05	0	0.05
Nfic	0	0.05	0	0	0	0.01	0.06	0.06	0.02	0.01	0.03	0	0.06	0.06	0	0	0.02	0.07	0.08	0.09	0.01	0.01	0.01	0.02	0.01	0	0	0	0.01	0.09	0.11	0.11	0.02	0.06	0.01	0	0.05	0.04	0.01	0	0.06	0.06	0.06	0.07	0.06	0	0.07	0	0.07
Nfil3	0	0	0	0.01	0	0	0	0	0	0	0	0	0	0	0	0	0	0	0	0	0	0	0	0	0	0	0	0	0	0	0	0	0	0	0	0	0	0	0	0	0	0	0	0	0	0	0	0	0
Nfix	0.01	0.17	0.01	0	0	0.05	0.21	0.23	0.07	0.03	0.03	0	0.13	0.13	0	0.03	0.04	0.04	0.04	0.03	0.04	0.17	0.03	0.03	0.03	0	0	0	0.03	0.19	0.18	0.21	0.06	0.2	0.04	0	0.21	0.21	0.04	0	0.18	0.18	0.18	0.19	0.2	0	0.22	0	0.25
Nfkb1	0	0	0	0	0.01	0	0	0	0	0	0	0	0	0	0	0	0	0	0	0	0	0	0	0	0	0	0	0	0	0	0	0	0	0	0	0	0	0	0	0	0	0	0	0	0	0	0	0	0
Nfkb2	0.17	0.43	0	0	0	0.29	0.42	0.45	0.22	0.3	0.22	0	0.41	0.26	0	0.25	0.22	0.29	0.28	0.3	0.43	0.32	0.21	0.24	0.13	0	0	0	0.14	0.43	0.42	0.45	0.19	0.48	0.09	0	0.43	0.46	0.22	0	0.31	0.32	0.36	0.32	0.35	0	0.39	0	0.38
Nfya	0	0	0	0	0.01	0	0.02	0.02	0.01	0	0.01	0	0.01	0.01	0	0	0.01	0	0	0	0.01	0.01	0.01	0.01	0.01	0	0	0	0	0.04	0.03	0.04	0	0.04	0.01	0	0.04	0.05	0.01	0	0.04	0.04	0.04	0.03	0.04	0	0.03	0	0.03
Nfyb	0.35	0.36	0	0.01	0	0.24	0.38	0.38	0.19	0.19	0.21	0	0.33	0.32	0	0.08	0.36	0.25	0.28	0.26	0.22	0.22	0.14	0.13	0.14	0	0	0	0.11	0.38	0.41	0.4	0.15	0.41	0.07	0	0.4	0.42	0.07	0	0.3	0.28	0.29	0.32	0.33	0	0.33	0	0.34
Nfyc	0	0	0	0	0.01	0	0	0	0	0	0	0	0	0	0	0	0	0	0	0	0	0	0	0	0	0	0	0	0	0	0	0	0	0	0	0	0	0	0	0	0	0	0	0	0	0	0	0	0
Nhlh1	0.37	0.55	0	0.01	0.01	0.36	0.56	0.58	0.85	0.18	0.31	0	0.86	0.86	0	0.08	0.15	0.33	0.35	0.34	0.22	0.28	0.21	0.16	0.18	0	0	0	0.33	0.42	0.44	0.45	0.15	0.44	0.08	0	0.45	0.44	0.21	0	0.34	0.37	0.39	0.37	0.39	0	0.39	0	0.41
Nkx2-1	0	0	0.01	0.01	0.01	0	0	0	0	0	0	0.01	0	0	0	0	0	0	0	0	0	0	0	0	0	0	0	0	0	0	0	0	0	0	0	0	0	0	0	0	0	0	0	0	0	0	0	0	0
Nkx2-2	0	0	0	0.01	0	0	0	0	0	0	0	0	0	0	0	0	0	0	0	0	0	0	0	0	0	0	0	0	0	0	0	0	0	0	0	0	0	0	0	0	0	0	0	0	0	0	0	0	0
Nkx2-5	0	0	0.01	0.01	0	0	0	0	0	0	0	0	0	0	0	0	0	0	0	0	0	0	0	0	0	0	0	0	0	0	0	0	0	0	0	0	0	0	0	0	0	0	0	0	0	0	0	0	0
Nkx3-1	0	0	0.01	0.01	0.01	0	0	0	0	0	0	0.01	0	0	0	0	0	0	0	0	0	0	0	0	0	0	0	0	0	0	0	0	0	0	0	0	0	0	0	0	0	0	0	0	0	0	0	0	0
Nobox	0	0	0	0.01	0.01	0	0	0	0	0	0	0	0	0	0.01	0	0	0	0	0	0	0	0	0	0	0	0	0	0	0	0	0	0	0	0	0	0	0	0	0	0	0	0	0	0	0	0	0	0
Nr1h2	0	0.01	0.01	0.01	0.01	0	0.03	0.03	0	0.01	0	0	0.01	0.01	0	0	0.01	0.06	0.06	0.06	0.01	0.01	0	0.01	0.01	0	0	0	0	0.04	0.04	0.04	0.01	0.05	0	0	0.04	0.05	0	0	0.03	0.04	0.03	0.04	0.04	0	0.04	0	0.04
Nr1h3	0.1	0.34	0.01	0.01	0	0.18	0.35	0.35	0.18	0.25	0.2	0	0.29	0.26	0	0.18	0.22	0.3	0.29	0.32	0.44	0.21	0.12	0.25	0.26	0	0	0	0.13	0.44	0.43	0.44	0.22	0.42	0.14	0	0.47	0.45	0.11	0	0.27	0.29	0.33	0.31	0.33	0	0.34	0	0.34
Nr1h4	0	0	0.01	0.01	0.01	0	0	0	0	0	0	0	0	0	0	0	0	0	0	0	0	0	0	0	0	0	0	0	0	0	0	0	0	0	0	0	0	0	0	0	0	0	0	0	0	0	0	0	0
Nr1i2	0.11	0.36	0.01	0.01	0	0.21	0.36	0.39	0.24	0.29	0.26	0	0.39	0.32	0	0.17	0.29	0.34	0.34	0.36	0.55	0.23	0.13	0.31	0.33	0	0	0	0.15	0.46	0.49	0.49	0.27	0.42	0.16	0	0.53	0.55	0.08	0	0.34	0.33	0.37	0.36	0.39	0	0.41	0	0.43
Nr1i3	0	0.12	0.01	0.01	0.01	0.02	0.15	0.15	0.09	0.02	0.07	0	0.1	0.1	0	0.01	0.25	0.11	0.1	0.12	0.02	0.03	0.01	0.03	0.02	0	0	0	0.01	0.15	0.15	0.16	0.13	0.12	0.02	0	0.1	0.1	0.01	0	0.23	0.25	0.25	0.26	0.26	0	0.29	0	0.29
Nr2f1	0.08	0.39	0.01	0.01	0.01	0.16	0.4	0.43	0.26	0.37	0.22	0.01	0.42	0.38	0	0.09	0.48	0.37	0.39	0.38	0.54	0.38	0.07	0.18	0.46	0	0	0	0.22	0.63	0.64	0.66	0.09	0.42	0.14	0	0.57	0.58	0.07	0	0.35	0.33	0.36	0.38	0.37	0	0.41	0	0.39
Nr2f2	0.12	0.35	0.01	0.01	0.02	0.18	0.36	0.38	0.18	0.24	0.22	0.01	0.35	0.28	0	0.17	0.24	0.33	0.33	0.37	0.47	0.22	0.13	0.26	0.27	0	0	0	0.14	0.44	0.46	0.48	0.24	0.43	0.14	0	0.47	0.51	0.1	0	0.31	0.28	0.29	0.33	0.33	0	0.33	0	0.39
Nr3c1	0.02	0.19	0.02	0.01	0.01	0.07	0.16	0.2	0.11	0.07	0.11	0.01	0.21	0.2	0	0.05	0.06	0.06	0.07	0.05	0.08	0.08	0.06	0.06	0.05	0	0	0	0.06	0.27	0.29	0.29	0.07	0.24	0.04	0	0.17	0.19	0.04	0	0.15	0.17	0.19	0.16	0.18	0	0.17	0	0.2
Nr5a1	0	0	0.01	0.01	0.01	0	0	0	0	0	0	0.01	0	0	0.01	0	0	0	0	0	0	0	0	0	0	0	0	0	0	0	0	0	0	0	0	0	0	0	0	0	0	0	0	0	0	0	0	0	0
Nr5a2	0	0	0.01	0.01	0.01	0	0	0	0	0	0	0.01	0	0	0	0	0	0	0	0	0	0	0	0	0	0.01	0	0	0	0.01	0	0	0	0	0	0	0	0	0	0	0	0	0	0	0	0	0	0	0
Nr6a1	0	0	0.01	0.01	0.01	0	0	0	0	0	0	0	0	0.01	0.01	0	0	0	0	0	0	0	0	0	0	0.01	0	0	0	0	0	0	0	0	0	0	0	0	0	0	0	0	0	0	0	0	0	0	0
Onecut1	0	0	0.01	0.01	0.01	0	0	0	0	0	0	0.01	0	0.01	0.01	0	0	0	0	0	0	0	0	0	0	0	0	0	0	0	0	0	0	0	0	0	0	0	0	0	0	0	0	0	0	0	0	0	0
Onecut2	0	0	0.02	0.02	0.02	0	0.01	0	0	0	0	0.01	0	0	0.01	0	0	0	0	0	0	0	0	0	0	0	0	0	0	0	0	0	0	0	0	0	0	0	0	0	0	0	0	0	0	0	0	0	0
Pax2	0	0	0.01	0.01	0.01	0	0	0	0	0	0	0.01	0	0	0.01	0	0	0	0	0	0	0	0	0	0	0.01	0.01	0	0	0	0.01	0.01	0	0	0	0	0	0	0	0	0	0	0.01	0	0.01	0	0	0	0
Pax3	0	0	0.01	0.02	0.02	0	0	0	0	0	0	0.01	0	0	0.02	0	0	0	0	0	0	0.01	0	0	0	0	0.01	0	0	0	0	0	0	0	0	0	0	0	0	0	0.01	0	0	0	0.01	0	0	0	0
Pax4	0	0	0.02	0.02	0.02	0	0	0	0	0	0	0.01	0	0	0.01	0	0	0	0	0	0	0	0	0	0	0	0	0.01	0	0	0	0.01	0	0	0	0	0	0	0	0	0.01	0	0	0	0	0	0	0	0
Pax5	0	0	0.02	0.02	0.01	0.01	0	0	0	0	0	0.01	0	0	0.01	0	0	0.01	0	0	0	0	0	0	0	0.01	0	0	0	0	0	0	0	0	0	0	0	0	0	0	0	0	0	0	0	0	0	0	0
Pax6	0	0	0.02	0.02	0.02	0	0	0	0	0	0	0.01	0	0	0.01	0.01	0	0	0	0	0	0	0	0	0	0.01	0.01	0	0.01	0	0	0	0	0	0	0	0	0	0	0	0	0	0	0	0	0	0	0	0
Pbx1	0.01	0.14	0.02	0.02	0.02	0.04	0.18	0.18	0.13	0.03	0.38	0.01	0.26	0.23	0.01	0.04	0.03	0.19	0.19	0.2	0.04	0.05	0.04	0.03	0.03	0	0.01	0	0.03	0.14	0.13	0.13	0.05	0.33	0.03	0	0.22	0.23	0.03	0	0.23	0.21	0.25	0.23	0.23	0	0.25	0	0.26
Pbx2	0.07	0.28	0.02	0.02	0.02	0.26	0.32	0.31	0.13	0.07	0.12	0.02	0.19	0.18	0.01	0.03	0.1	0.29	0.3	0.34	0.16	0.15	0.1	0.13	0.08	0.01	0.01	0	0.08	0.32	0.3	0.36	0.07	0.33	0.03	0	0.35	0.38	0.04	0	0.23	0.23	0.2	0.24	0.24	0	0.26	0	0.26
Pbx3	0.02	0.06	0.02	0.02	0.02	0.04	0.09	0.09	0.06	0.04	0.03	0.01	0.12	0.11	0.01	0.03	0.03	0.16	0.16	0.18	0.04	0.04	0.03	0.03	0.04	0.01	0	0.01	0.03	0.17	0.17	0.21	0.05	0.16	0.03	0	0.11	0.1	0.03	0	0.18	0.17	0.18	0.19	0.19	0	0.21	0	0.2
Pdx1	0	0	0.02	0.03	0.02	0	0	0	0	0.01	0	0.02	0	0	0.01	0.01	0.01	0	0	0	0	0	0	0	0	0.01	0.01	0.01	0	0	0	0.01	0	0	0	0	0	0	0	0.01	0	0	0.01	0	0	0	0.01	0	0
Pou1f1	0	0	0.03	0.02	0.03	0	0.01	0	0	0	0	0.01	0.01	0.01	0.01	0	0	0	0	0	0	0	0	0	0	0.01	0	0.01	0	0	0	0	0	0	0	0	0.01	0.01	0	0.01	0.01	0	0	0	0	0	0.01	0	0
Pou2af1	0.01	0.05	0.02	0.03	0.02	0.03	0.07	0.07	0.11	0.03	0.04	0.01	0.2	0.2	0.01	0.03	0.03	0.03	0.03	0.03	0.04	0.03	0.04	0.03	0.03	0.01	0	0.01	0.04	0.26	0.26	0.29	0.04	0.27	0.04	0	0.21	0.21	0.03	0.01	0.19	0.22	0.21	0.22	0.22	0	0.22	0	0.24
Pou2f1	0.39	0.22	0.02	0.02	0.02	0.05	0.27	0.26	0.11	0.09	0.07	0.01	0.14	0.15	0.01	0.37	0.05	0.13	0.14	0.12	0.16	0.23	0.02	0.15	0.03	0.01	0.01	0.01	0.04	0.24	0.23	0.26	0.03	0.24	0.02	0	0.26	0.27	0.02	0	0.13	0.12	0.13	0.14	0.16	0	0.16	0	0.17
Pou2f2	0.42	0.27	0.02	0.02	0.02	0.05	0.3	0.26	0.15	0.09	0.08	0.01	0.16	0.16	0.02	0.38	0.05	0.14	0.15	0.17	0.17	0.22	0.02	0.16	0.03	0	0	0.01	0.02	0.25	0.26	0.28	0.04	0.27	0.02	0	0.27	0.3	0.02	0	0.14	0.14	0.14	0.17	0.17	0	0.16	0	0.18
Pou2f3	0.44	0.28	0.03	0.03	0.02	0.05	0.3	0.3	0.14	0.11	0.09	0.01	0.18	0.16	0.02	0.37	0.06	0.16	0.16	0.18	0.16	0.24	0.03	0.2	0.05	0.01	0.01	0.01	0.03	0.26	0.3	0.29	0.04	0.26	0.03	0.01	0.27	0.28	0.02	0	0.15	0.16	0.16	0.17	0.18	0	0.19	0	0.17
Pou3f1	0.45	0.29	0.03	0.02	0.02	0.06	0.32	0.3	0.16	0.1	0.11	0.02	0.18	0.21	0.02	0.41	0.05	0.18	0.18	0.18	0.19	0.26	0.03	0.18	0.04	0	0.01	0.01	0.03	0.3	0.28	0.31	0.04	0.3	0.02	0	0.32	0.31	0.02	0.01	0.16	0.16	0.17	0.16	0.17	0	0.18	0	0.18
Pou3f2	0.5	0.29	0.03	0.03	0.02	0.05	0.34	0.34	0.19	0.1	0.11	0.02	0.21	0.22	0.02	0.42	0.05	0.21	0.19	0.19	0.2	0.27	0.03	0.18	0.05	0.01	0	0.01	0.03	0.33	0.34	0.35	0.05	0.29	0.03	0	0.32	0.33	0.02	0	0.18	0.16	0.19	0.18	0.19	0	0.19	0	0.19
Pou3f3	0.53	0.29	0.04	0.02	0.03	0.06	0.35	0.34	0.21	0.1	0.14	0.02	0.22	0.24	0.02	0.45	0.06	0.23	0.22	0.21	0.22	0.3	0.04	0.21	0.04	0.01	0.01	0.01	0.04	0.32	0.34	0.34	0.05	0.32	0.02	0	0.33	0.33	0.02	0	0.18	0.16	0.18	0.19	0.19	0	0.21	0	0.2
Pou3f4	0.54	0.32	0.03	0.03	0.02	0.06	0.37	0.34	0.19	0.12	0.12	0.02	0.25	0.25	0.02	0.47	0.07	0.22	0.21	0.24	0.22	0.31	0.05	0.22	0.05	0.01	0.01	0.01	0.03	0.35	0.36	0.38	0.05	0.32	0.03	0.01	0.35	0.34	0.03	0	0.17	0.19	0.2	0.19	0.2	0	0.21	0	0.21
Pou4f1	0.58	0.35	0.03	0.02	0.03	0.07	0.4	0.38	0.21	0.12	0.16	0.03	0.26	0.26	0.01	0.49	0.06	0.25	0.25	0.25	0.22	0.33	0.04	0.22	0.05	0.01	0.01	0	0.04	0.38	0.41	0.38	0.05	0.35	0.02	0.01	0.37	0.38	0.02	0.01	0.19	0.2	0.19	0.21	0.2	0	0.23	0	0.25
Pou5f1	0.02	0.27	0.03	0.04	0.04	0.05	0.27	0.29	0.12	0.05	0.05	0.03	0.24	0.2	0.02	0.04	0.03	0.09	0.09	0.08	0.05	0.05	0.04	0.04	0.04	0.01	0.01	0.01	0.04	0.29	0.31	0.33	0.05	0.31	0.05	0.01	0.21	0.22	0.04	0	0.13	0.14	0.13	0.15	0.14	0	0.14	0	0.16
Pou6f1	0	0	0.03	0.03	0.04	0	0	0	0	0	0.01	0.02	0.01	0.01	0.02	0	0	0.01	0.01	0	0.01	0	0.01	0.01	0	0.01	0.01	0.01	0.01	0.01	0	0.01	0.01	0.01	0.01	0.01	0.01	0.01	0	0.01	0.01	0.01	0.01	0	0.01	0.01	0	0.01	0.01
Ppara	0.01	0.08	0.04	0.04	0.03	0.03	0.11	0.1	0.04	0.03	0.12	0.03	0.06	0.06	0.02	0.04	0.02	0.03	0.03	0.03	0.03	0.02	0.04	0.03	0.02	0.01	0.01	0.01	0.03	0.15	0.18	0.16	0.03	0.13	0.03	0.01	0.16	0.17	0.03	0.01	0.08	0.07	0.08	0.08	0.07	0	0.08	0.01	0.1
Pparg	0	0	0.05	0.05	0.04	0.01	0.01	0.01	0.01	0.01	0	0.03	0.01	0.01	0.03	0.01	0.01	0.01	0.01	0.01	0.01	0.01	0.01	0.01	0.01	0.02	0.02	0.01	0.01	0.01	0.01	0.01	0.01	0.01	0	0.01	0	0.01	0.01	0.01	0.01	0.01	0.01	0	0	0	0.01	0	0.01
Prrx2	0	0	0.05	0.04	0.05	0.01	0.01	0.01	0.01	0	0.01	0.03	0.01	0.01	0.03	0.01	0.01	0	0.01	0	0.01	0.01	0.01	0	0.01	0.02	0.01	0.02	0.01	0.01	0.01	0.01	0	0.01	0.01	0.01	0.01	0.01	0	0.01	0.01	0.01	0.01	0.01	0	0.01	0.01	0.01	0.01
Rara	0.13	0.35	0.05	0.04	0.04	0.19	0.36	0.4	0.21	0.27	0.25	0.03	0.37	0.31	0.02	0.2	0.28	0.34	0.37	0.35	0.49	0.24	0.14	0.3	0.28	0.02	0.01	0.02	0.14	0.46	0.45	0.5	0.26	0.45	0.15	0.01	0.51	0.54	0.12	0.01	0.33	0.32	0.33	0.34	0.36	0	0.37	0	0.38
Rarb	0.14	0.37	0.05	0.04	0.05	0.18	0.36	0.42	0.21	0.28	0.24	0.04	0.37	0.33	0.02	0.22	0.27	0.35	0.4	0.42	0.53	0.24	0.15	0.31	0.3	0.01	0.02	0.02	0.16	0.48	0.51	0.53	0.26	0.46	0.15	0.01	0.53	0.55	0.12	0.01	0.34	0.34	0.36	0.35	0.35	0.01	0.38	0	0.41
Rarg	0.13	0.39	0.04	0.04	0.04	0.21	0.41	0.41	0.24	0.31	0.26	0.04	0.39	0.36	0.02	0.22	0.28	0.39	0.41	0.4	0.53	0.27	0.15	0.32	0.3	0.02	0.01	0.02	0.15	0.51	0.53	0.53	0.27	0.48	0.17	0.01	0.55	0.58	0.13	0.01	0.34	0.35	0.37	0.35	0.36	0.01	0.4	0	0.41
Rax	0	0	0.05	0.05	0.05	0.01	0.03	0.03	0.01	0.01	0.04	0.03	0.02	0.01	0.03	0.01	0.01	0.01	0.01	0.01	0.01	0.02	0.01	0.01	0.01	0.02	0.02	0.02	0.01	0.05	0.05	0.05	0.02	0.06	0.01	0.01	0.07	0.06	0.01	0.01	0.06	0.06	0.06	0.06	0.06	0	0.07	0.01	0.07
Rbpj	0	0	0.06	0.06	0.05	0.01	0.01	0.01	0.01	0.01	0.01	0.03	0.01	0.01	0.04	0.01	0.01	0.01	0.01	0.01	0	0.01	0.01	0.01	0.01	0.02	0.02	0.01	0.01	0.01	0.01	0.01	0.01	0.01	0.01	0.01	0.01	0.01	0	0.01	0.01	0.01	0.01	0.01	0.01	0.01	0.01	0.01	0.01
Rela	0	0.01	0.07	0.05	0.05	0.01	0.03	0.03	0.01	0.02	0.01	0.04	0.03	0.03	0.04	0.02	0.02	0.05	0.06	0.06	0.02	0.02	0.01	0.02	0.02	0.02	0.02	0.02	0.01	0.08	0.09	0.09	0.01	0.05	0.02	0.01	0.09	0.09	0.02	0.01	0.06	0.06	0.06	0.05	0.06	0	0.05	0.01	0.06
Rest	0	0	0.07	0.06	0.06	0.01	0.01	0.01	0.01	0	0.01	0.04	0.01	0.01	0.04	0.01	0.01	0.01	0.01	0.01	0.01	0.01	0.01	0.01	0.01	0.02	0.02	0.03	0.01	0.01	0.01	0.01	0.02	0.01	0.01	0.02	0.01	0.01	0.01	0.01	0.01	0.01	0.01	0.01	0.01	0.01	0.01	0.01	0.01
Rfx1	0	0	0.07	0.06	0.06	0.01	0.01	0.01	0.01	0.01	0.01	0.04	0.01	0.01	0.04	0.01	0.01	0.01	0.01	0.01	0	0	0.01	0.01	0.01	0.03	0.03	0.03	0.01	0.01	0.01	0.01	0.01	0.01	0.01	0.02	0.01	0.01	0.01	0.01	0.01	0.01	0.01	0.01	0.01	0.01	0.01	0.01	0.01
Rfx2	0.05	0.37	0.07	0.04	0.06	0.13	0.39	0.42	0.25	0.21	0.26	0.05	0.4	0.34	0.04	0.12	0.13	0.28	0.27	0.31	0.26	0.38	0.29	0.21	0.24	0.03	0.02	0.03	0.14	0.4	0.38	0.42	0.09	0.44	0.13	0.01	0.53	0.53	0.1	0.01	0.4	0.4	0.4	0.44	0.45	0.01	0.46	0.01	0.48
Rfx3	0.05	0.39	0.06	0.06	0.06	0.15	0.43	0.42	0.25	0.21	0.26	0.04	0.38	0.37	0.04	0.11	0.13	0.3	0.3	0.3	0.27	0.38	0.31	0.19	0.24	0.03	0.03	0.02	0.15	0.39	0.43	0.45	0.1	0.47	0.12	0.02	0.55	0.57	0.11	0.01	0.41	0.42	0.42	0.47	0.48	0.01	0.47	0.01	0.48
Rfx4	0.04	0.42	0.07	0.07	0.07	0.16	0.44	0.44	0.26	0.19	0.28	0.04	0.43	0.36	0.04	0.13	0.15	0.3	0.33	0.33	0.28	0.4	0.32	0.21	0.25	0.03	0.02	0.03	0.15	0.41	0.44	0.43	0.11	0.5	0.15	0.02	0.59	0.59	0.09	0.01	0.44	0.45	0.48	0.46	0.48	0.01	0.51	0.01	0.51
Rfx5	0.06	0.43	0.06	0.07	0.08	0.15	0.48	0.46	0.28	0.22	0.31	0.05	0.45	0.37	0.04	0.13	0.15	0.32	0.34	0.36	0.3	0.43	0.31	0.23	0.26	0.02	0.02	0.03	0.17	0.42	0.45	0.49	0.1	0.52	0.14	0.02	0.6	0.6	0.11	0.01	0.47	0.46	0.48	0.5	0.49	0.01	0.52	0	0.54
Rfxank	0.06	0.45	0.07	0.08	0.07	0.17	0.44	0.5	0.27	0.23	0.33	0.05	0.44	0.4	0.03	0.14	0.15	0.33	0.34	0.35	0.3	0.43	0.35	0.23	0.27	0.03	0.02	0.02	0.19	0.45	0.48	0.48	0.11	0.53	0.13	0.03	0.58	0.64	0.11	0.01	0.46	0.47	0.49	0.49	0.51	0.01	0.5	0.01	0.53
Rfxap	0	0.04	0.07	0.07	0.08	0.02	0.06	0.07	0.03	0.02	0.02	0.06	0.03	0.02	0.04	0.02	0.03	0.04	0.04	0.04	0.03	0.02	0.02	0.02	0.03	0.03	0.03	0.03	0.02	0.11	0.12	0.11	0.03	0.13	0.03	0.02	0.13	0.13	0.01	0.01	0.09	0.1	0.1	0.1	0.11	0.01	0.1	0.01	0.11
Rora	0	0	0.1	0.09	0.07	0	0.01	0.01	0.01	0.02	0.01	0.06	0.01	0.01	0.05	0.01	0.01	0.01	0.01	0.01	0.02	0.01	0.01	0.01	0.01	0.03	0.03	0.03	0.01	0.01	0.01	0.01	0.01	0.01	0.01	0.02	0.02	0.02	0.01	0.02	0.02	0.01	0.01	0.02	0.02	0.01	0.01	0.01	0.01
Runx1	0.11	0.42	0.08	0.07	0.07	0.19	0.43	0.45	0.19	0.33	0.24	0.05	0.3	0.33	0.05	0.17	0.29	0.28	0.28	0.29	0.39	0.48	0.1	0.34	0.33	0.03	0.03	0.03	0.13	0.43	0.43	0.47	0.12	0.41	0.22	0.01	0.42	0.41	0.11	0.02	0.32	0.35	0.35	0.35	0.36	0.01	0.38	0.01	0.39
Runx2	0.11	0.42	0.08	0.07	0.07	0.2	0.45	0.47	0.19	0.35	0.24	0.06	0.32	0.34	0.06	0.14	0.31	0.28	0.3	0.32	0.4	0.49	0.11	0.34	0.34	0.03	0.03	0.03	0.15	0.47	0.47	0.48	0.14	0.43	0.24	0.02	0.44	0.44	0.12	0.02	0.34	0.34	0.36	0.38	0.39	0.01	0.4	0.01	0.41
Runx3	0	0.02	0.09	0.1	0.09	0.02	0.04	0.05	0.03	0.02	0.04	0.07	0.04	0.04	0.05	0.02	0.02	0.03	0.03	0.02	0.03	0.02	0.02	0.02	0.02	0.03	0.03	0.03	0.03	0.07	0.05	0.07	0.02	0.07	0.02	0.02	0.09	0.09	0.02	0.02	0.06	0.05	0.05	0.05	0.06	0.01	0.07	0.01	0.06
Rxra	0	0.14	0.08	0.07	0.07	0.03	0.17	0.16	0.08	0.03	0.08	0.05	0.12	0.11	0.05	0.02	0.27	0.13	0.12	0.12	0.03	0.04	0.02	0.03	0.03	0.03	0.03	0.03	0.02	0.15	0.17	0.15	0.17	0.13	0.03	0.02	0.13	0.13	0.02	0.02	0.26	0.28	0.25	0.29	0.3	0.01	0.31	0.01	0.31
Rxrb	0.01	0.11	0.08	0.08	0.07	0.04	0.12	0.14	0.08	0.03	0.07	0.05	0.08	0.08	0.04	0.02	0.18	0.1	0.08	0.09	0.05	0.04	0.03	0.04	0.03	0.02	0.03	0.03	0.03	0.2	0.18	0.19	0.12	0.12	0.02	0.02	0.14	0.14	0.03	0.01	0.22	0.2	0.22	0.21	0.21	0.01	0.23	0.01	0.23
Sfpi1	0.55	0.49	0.11	0.1	0.08	0.72	0.52	0.53	0.36	0.57	0.48	0.08	0.56	0.49	0.07	0.32	0.36	0.41	0.42	0.46	0.46	0.49	0.23	0.39	0.37	0.03	0.04	0.04	0.25	0.65	0.7	0.69	0.41	0.64	0.3	0.03	0.54	0.56	0.2	0.02	1	1	1	1	1	0.01	1	0.02	1
Smad3	0	0	0.1	0.13	0.12	0.01	0.01	0.02	0.02	0.02	0.01	0.07	0.01	0.02	0.07	0.02	0.02	0.01	0.01	0.02	0.02	0.01	0.01	0.02	0.01	0.04	0.04	0.05	0.02	0.02	0.02	0.02	0.02	0.02	0.02	0.03	0.02	0.02	0.01	0.03	0.02	0.01	0.01	0.02	0.02	0.01	0.01	0.02	0.01
Sox9	0	0	0.14	0.12	0.12	0.02	0.02	0.01	0.01	0.02	0.01	0.08	0.03	0.02	0.08	0.01	0.02	0.01	0.02	0.02	0.02	0.02	0.02	0.02	0.02	0.05	0.04	0.05	0.02	0.03	0.01	0.02	0.01	0.02	0.02	0.03	0.02	0.01	0.01	0.03	0.02	0.02	0.01	0.02	0.02	0.02	0.02	0.02	0.01
Sp1	0	0.01	0.12	0.11	0.11	0.02	0.05	0.04	0.03	0.02	0.02	0.08	0.04	0.03	0.08	0.03	0.03	0.08	0.06	0.06	0.03	0.03	0.02	0.02	0.02	0.05	0.05	0.05	0.03	0.07	0.08	0.08	0.03	0.06	0.03	0.03	0.07	0.07	0.02	0.03	0.09	0.07	0.09	0.1	0.1	0.02	0.1	0.01	0.12
Sp2	0.09	0.34	0.1	0.12	0.09	0.1	0.4	0.38	0.21	0.17	0.29	0.08	0.36	0.25	0.06	0.04	0.52	0.27	0.28	0.31	0.36	0.15	0.24	0.32	0.24	0.03	0.04	0.05	0.07	0.38	0.39	0.45	0.1	0.39	0.06	0.03	0.93	0.97	0.06	0.02	0.32	0.33	0.34	0.35	0.37	0.02	0.38	0.01	0.4
Sp3	0.08	0.39	0.12	0.11	0.11	0.11	0.41	0.42	0.2	0.18	0.28	0.07	0.36	0.26	0.08	0.07	0.56	0.26	0.31	0.32	0.39	0.15	0.24	0.34	0.27	0.05	0.04	0.04	0.07	0.41	0.44	0.46	0.11	0.4	0.05	0.03	0.97	1	0.07	0.02	0.34	0.36	0.37	0.36	0.37	0.02	0.38	0.02	0.39
Sp4	0	0.01	0.15	0.14	0.12	0.02	0.03	0.04	0.02	0.02	0.05	0.09	0.03	0.03	0.09	0.02	0.02	0.03	0.02	0.02	0.02	0.03	0.02	0.02	0.02	0.06	0.06	0.05	0.02	0.07	0.07	0.07	0.02	0.06	0.02	0.03	0.09	0.09	0.02	0.03	0.08	0.07	0.07	0.07	0.08	0.02	0.08	0.01	0.08
Spib	0	0	0.15	0.15	0.13	0.02	0.05	0.05	0.03	0.02	0.02	0.1	0.02	0.04	0.1	0.02	0.02	0.03	0.04	0.02	0.03	0.03	0.02	0.03	0.03	0.05	0.06	0.06	0.03	0.06	0.07	0.07	0.03	0.07	0.02	0.03	0.07	0.07	0.02	0.03	0.07	0.06	0.06	0.06	0.06	0.02	0.06	0.02	0.06
Spz1	0	0	0.16	0.16	0.16	0.02	0.02	0.02	0.02	0.02	0.01	0.1	0.02	0.02	0.09	0.03	0.02	0.02	0.02	0.02	0.02	0.02	0.02	0.02	0.01	0.07	0.06	0.06	0.02	0.02	0.03	0.03	0.02	0.02	0.02	0.04	0.03	0.02	0.02	0.03	0.03	0.02	0.03	0.02	0.03	0.02	0.02	0.02	0.02
Srebf1	0.02	0.23	0.14	0.15	0.13	0.07	0.24	0.26	0.06	0.07	0.07	0.1	0.12	0.11	0.09	0.06	0.06	0.09	0.09	0.09	0.08	0.07	0.05	0.06	0.05	0.06	0.06	0.06	0.06	0.2	0.21	0.24	0.07	0.21	0.36	0.05	0.17	0.17	0.06	0.04	0.17	0.17	0.16	0.16	0.17	0.03	0.19	0.02	0.18
Srebf2	0.02	0.24	0.16	0.13	0.13	0.09	0.26	0.27	0.09	0.24	0.05	0.1	0.17	0.15	0.09	0.06	0.07	0.06	0.07	0.07	0.1	0.17	0.07	0.06	0.06	0.07	0.05	0.07	0.06	0.19	0.2	0.22	0.1	0.24	0.05	0.03	0.25	0.25	0.05	0.03	0.17	0.19	0.18	0.18	0.21	0.03	0.19	0.02	0.2
Srf	0	0	0.17	0.18	0.18	0.02	0.02	0.02	0.02	0.02	0.01	0.13	0.02	0.02	0.12	0.03	0.02	0.03	0.02	0.02	0.03	0.02	0.02	0.02	0.02	0.07	0.06	0.07	0.03	0.03	0.02	0.03	0.02	0.02	0.02	0.05	0.03	0.02	0.02	0.04	0.03	0.03	0.02	0.02	0.02	0.03	0.02	0.02	0.03
Sry	0	0	0.18	0.17	0.16	0.02	0.02	0.02	0.02	0.01	0.02	0.13	0.02	0.02	0.13	0.03	0.02	0.02	0.02	0.03	0.02	0.02	0.02	0.02	0.01	0.08	0.07	0.06	0.03	0.03	0.03	0.03	0.03	0.02	0.02	0.05	0.03	0.03	0.02	0.04	0.02	0.03	0.03	0.03	0.03	0.03	0.03	0.03	0.03
Stat1	0.01	0.22	0.16	0.18	0.17	0.06	0.25	0.26	0.07	0.05	0.03	0.13	0.13	0.13	0.12	0.04	0.06	0.05	0.05	0.06	0.06	0.06	0.04	0.04	0.05	0.08	0.07	0.06	0.06	0.18	0.19	0.2	0.06	0.17	0.04	0.04	0.3	0.32	0.05	0.04	0.12	0.11	0.13	0.12	0.12	0.03	0.13	0.02	0.15
Stat2	0.08	0.25	0.14	0.16	0.14	0.08	0.3	0.3	0.14	0.18	0.13	0.12	0.21	0.14	0.08	0.03	0.33	0.14	0.13	0.17	0.19	0.25	0.06	0.07	0.09	0.06	0.06	0.06	0.05	0.32	0.33	0.33	0.11	0.31	0.05	0.04	0.24	0.23	0.04	0.03	0.2	0.22	0.21	0.22	0.24	0.03	0.24	0.03	0.24
Stat3	0.08	0.24	0.14	0.13	0.14	0.09	0.29	0.29	0.14	0.21	0.14	0.11	0.23	0.16	0.1	0.04	0.35	0.15	0.14	0.17	0.19	0.26	0.06	0.07	0.11	0.06	0.06	0.05	0.05	0.34	0.36	0.34	0.1	0.29	0.05	0.04	0.24	0.25	0.04	0.04	0.22	0.22	0.23	0.23	0.23	0.02	0.26	0.03	0.26
Stat4	0.1	0.3	0.16	0.16	0.15	0.09	0.32	0.32	0.14	0.21	0.15	0.12	0.25	0.16	0.09	0.03	0.36	0.17	0.17	0.18	0.21	0.28	0.05	0.06	0.11	0.07	0.06	0.06	0.06	0.36	0.37	0.37	0.08	0.33	0.05	0.05	0.26	0.25	0.03	0.05	0.22	0.22	0.24	0.27	0.26	0.03	0.24	0.02	0.28
Stat5a	0.12	0.3	0.17	0.15	0.15	0.1	0.36	0.35	0.14	0.21	0.16	0.12	0.28	0.17	0.11	0.04	0.4	0.17	0.19	0.19	0.21	0.28	0.07	0.07	0.12	0.08	0.06	0.06	0.06	0.35	0.39	0.4	0.1	0.33	0.05	0.05	0.27	0.29	0.04	0.03	0.22	0.25	0.25	0.27	0.27	0.03	0.28	0.03	0.26
Stat5b	0.12	0.33	0.19	0.17	0.16	0.1	0.37	0.37	0.17	0.21	0.18	0.13	0.28	0.2	0.11	0.04	0.42	0.19	0.19	0.21	0.25	0.33	0.06	0.06	0.11	0.08	0.07	0.07	0.06	0.39	0.4	0.41	0.1	0.37	0.05	0.05	0.28	0.29	0.05	0.04	0.25	0.24	0.27	0.26	0.28	0.03	0.29	0.02	0.33
Stat6	0	0.06	0.23	0.21	0.21	0.03	0.11	0.11	0.04	0.03	0.03	0.18	0.08	0.08	0.13	0.04	0.05	0.09	0.1	0.08	0.03	0.03	0.04	0.03	0.03	0.1	0.09	0.08	0.05	0.16	0.15	0.17	0.04	0.17	0.04	0.05	0.18	0.18	0.03	0.05	0.1	0.11	0.1	0.12	0.11	0.04	0.12	0.03	0.12
Tal1	0.41	0.58	0.21	0.22	0.21	0.36	0.58	0.61	0.88	0.21	0.33	0.15	0.87	0.87	0.14	0.09	0.18	0.34	0.31	0.36	0.23	0.29	0.22	0.15	0.18	0.09	0.1	0.08	0.33	0.45	0.46	0.47	0.18	0.43	0.1	0.06	0.45	0.43	0.22	0.05	0.36	0.36	0.41	0.39	0.4	0.05	0.43	0.03	0.4
Tal2	0.43	0.58	0.23	0.22	0.2	0.4	0.64	0.62	0.91	0.22	0.35	0.16	0.91	0.91	0.14	0.1	0.16	0.36	0.35	0.39	0.25	0.31	0.23	0.16	0.2	0.09	0.09	0.09	0.33	0.46	0.48	0.47	0.19	0.45	0.1	0.06	0.47	0.49	0.24	0.05	0.39	0.41	0.42	0.44	0.4	0.03	0.44	0.04	0.45
Tbp	0	0	0.27	0.26	0.24	0.02	0.03	0.03	0.02	0.03	0.02	0.2	0.03	0.03	0.19	0.04	0.03	0.04	0.03	0.03	0.03	0.02	0.03	0.03	0.03	0.11	0.12	0.11	0.04	0.03	0.04	0.04	0.04	0.03	0.03	0.08	0.04	0.04	0.04	0.07	0.03	0.04	0.03	0.03	0.04	0.05	0.04	0.05	0.04
Tbx5	0	0	0.28	0.27	0.27	0.03	0.03	0.03	0.03	0.02	0.02	0.18	0.04	0.03	0.18	0.04	0.04	0.03	0.03	0.03	0.03	0.03	0.03	0.03	0.04	0.11	0.11	0.1	0.04	0.05	0.04	0.04	0.03	0.04	0.03	0.08	0.04	0.04	0.03	0.06	0.04	0.04	0.04	0.04	0.03	0.06	0.04	0.05	0.03
Tcf12	0.43	0.62	0.25	0.24	0.24	0.41	0.64	0.64	0.92	0.23	0.34	0.17	0.94	0.94	0.17	0.1	0.19	0.35	0.39	0.39	0.26	0.31	0.21	0.18	0.19	0.11	0.11	0.11	0.36	0.49	0.5	0.52	0.19	0.47	0.11	0.08	0.49	0.5	0.24	0.05	0.39	0.41	0.43	0.42	0.44	0.04	0.43	0.05	0.46
Tcf3	0.42	0.49	0.27	0.27	0.25	0.18	0.52	0.56	0.58	0.18	0.23	0.21	0.75	0.7	0.18	0.05	0.16	0.31	0.33	0.34	0.22	0.29	0.11	0.12	0.16	0.11	0.11	0.1	0.38	0.48	0.46	0.5	0.1	0.43	0.06	0.07	0.45	0.49	0.25	0.06	0.34	0.37	0.38	0.38	0.41	0.04	0.41	0.05	0.46
Tcf4	0.46	0.64	0.28	0.28	0.27	0.39	0.65	0.67	0.96	0.24	0.39	0.2	0.96	0.96	0.19	0.11	0.18	0.37	0.4	0.4	0.25	0.34	0.24	0.17	0.21	0.13	0.11	0.12	0.38	0.49	0.52	0.54	0.2	0.48	0.12	0.07	0.49	0.53	0.27	0.06	0.43	0.42	0.41	0.43	0.46	0.05	0.47	0.05	0.49
Tcf7	0	0.06	0.32	0.29	0.25	0.03	0.1	0.1	0.05	0.03	0.03	0.23	0.1	0.07	0.19	0.03	0.05	0.05	0.04	0.04	0.04	0.04	0.04	0.04	0.03	0.12	0.11	0.13	0.06	0.12	0.1	0.12	0.05	0.14	0.03	0.08	0.11	0.12	0.03	0.06	0.07	0.1	0.09	0.08	0.09	0.05	0.08	0.04	0.09
Tfap2a	0	0	0.31	0.29	0.3	0.04	0.05	0.06	0.05	0.03	0.03	0.24	0.05	0.05	0.2	0.04	0.04	0.04	0.04	0.04	0.05	0.04	0.04	0.03	0.02	0.15	0.14	0.14	0.04	0.1	0.09	0.09	0.06	0.09	0.04	0.08	0.12	0.11	0.03	0.08	0.08	0.1	0.1	0.09	0.11	0.06	0.12	0.06	0.11
Tfap2b	0.06	0.63	0.25	0.25	0.25	0.11	0.73	0.7	0.22	0.25	0.27	0.21	0.31	0.3	0.18	0.06	0.27	0.31	0.31	0.33	0.44	0.15	0.1	0.22	0.11	0.13	0.11	0.13	0.08	0.39	0.38	0.39	0.11	0.35	0.29	0.08	0.98	1	0.06	0.06	0.3	0.31	0.33	0.3	0.36	0.05	0.35	0.06	0.37
Tfap2c	0.01	0.07	0.32	0.3	0.29	0.05	0.11	0.13	0.04	0.04	0.04	0.24	0.04	0.06	0.23	0.06	0.05	0.08	0.08	0.07	0.06	0.05	0.06	0.05	0.05	0.13	0.14	0.12	0.04	0.16	0.16	0.17	0.06	0.15	0.04	0.1	0.15	0.16	0.04	0.07	0.1	0.1	0.1	0.12	0.12	0.06	0.11	0.07	0.11
Tfap4	0	0	0.36	0.36	0.32	0.04	0.04	0.03	0.03	0.03	0.04	0.26	0.04	0.04	0.25	0.06	0.04	0.05	0.05	0.04	0.04	0.04	0.05	0.04	0.05	0.15	0.16	0.14	0.04	0.05	0.05	0.05	0.05	0.06	0.04	0.09	0.06	0.05	0.04	0.09	0.06	0.05	0.05	0.05	0.05	0.09	0.05	0.06	0.05
Tfcp2	0.01	0.1	0.35	0.33	0.33	0.06	0.13	0.14	0.05	0.04	0.07	0.27	0.08	0.07	0.21	0.05	0.06	0.17	0.16	0.18	0.07	0.06	0.05	0.06	0.04	0.13	0.15	0.15	0.07	0.14	0.15	0.13	0.06	0.15	0.05	0.11	0.19	0.2	0.07	0.09	0.1	0.11	0.12	0.12	0.12	0.06	0.12	0.06	0.14
Tfdp1	0	0	0.38	0.38	0.36	0.04	0.04	0.04	0.03	0.03	0.04	0.28	0.06	0.05	0.25	0.05	0.06	0.05	0.05	0.04	0.06	0.05	0.04	0.04	0.04	0.17	0.16	0.16	0.05	0.07	0.05	0.06	0.05	0.06	0.05	0.11	0.05	0.06	0.04	0.09	0.06	0.05	0.06	0.05	0.05	0.08	0.05	0.07	0.06
Tfe3	0.13	0.44	0.37	0.36	0.34	0.1	0.5	0.47	0.52	0.21	0.36	0.26	0.76	0.76	0.25	0.04	0.13	0.3	0.29	0.32	0.21	0.22	0.07	0.11	0.21	0.16	0.16	0.15	0.13	0.44	0.44	0.47	0.06	0.45	0.04	0.09	0.55	0.56	0.29	0.09	0.36	0.39	0.39	0.39	0.42	0.06	0.43	0.08	0.45
Tfeb	0.14	0.46	0.38	0.36	0.35	0.12	0.49	0.5	0.56	0.23	0.37	0.27	0.79	0.78	0.25	0.03	0.12	0.29	0.3	0.33	0.22	0.24	0.08	0.11	0.26	0.17	0.16	0.14	0.12	0.47	0.46	0.47	0.05	0.47	0.04	0.12	0.59	0.59	0.29	0.1	0.39	0.39	0.43	0.39	0.43	0.07	0.45	0.06	0.44
Tfec	0	0.02	0.39	0.38	0.36	0.04	0.07	0.07	0.04	0.03	0.04	0.31	0.04	0.05	0.26	0.05	0.04	0.05	0.05	0.05	0.05	0.05	0.04	0.04	0.04	0.17	0.19	0.15	0.06	0.13	0.13	0.13	0.05	0.14	0.04	0.13	0.1	0.1	0.04	0.1	0.11	0.1	0.11	0.1	0.09	0.08	0.09	0.06	0.1
Tgif1	0	0	0.45	0.44	0.43	0.05	0.05	0.03	0.04	0.05	0.04	0.34	0.06	0.04	0.31	0.06	0.05	0.06	0.06	0.05	0.06	0.05	0.05	0.06	0.04	0.19	0.19	0.18	0.07	0.06	0.06	0.06	0.07	0.06	0.06	0.12	0.06	0.07	0.06	0.11	0.06	0.06	0.06	0.06	0.06	0.09	0.07	0.1	0.06
Trp53	0	0	0.48	0.46	0.44	0.04	0.04	0.06	0.04	0.05	0.05	0.34	0.06	0.05	0.3	0.06	0.06	0.05	0.05	0.05	0.05	0.05	0.05	0.05	0.05	0.2	0.2	0.18	0.06	0.08	0.06	0.06	0.07	0.06	0.06	0.13	0.06	0.07	0.05	0.13	0.07	0.07	0.07	0.05	0.05	0.1	0.07	0.1	0.07
Usf1	0.47	0.67	0.45	0.43	0.42	0.42	0.69	0.7	1	0.26	0.41	0.32	1	0.99	0.26	0.12	0.18	0.4	0.4	0.42	0.28	0.34	0.25	0.17	0.2	0.2	0.19	0.19	0.39	0.52	0.55	0.56	0.19	0.49	0.12	0.14	0.53	0.52	0.25	0.13	0.42	0.46	0.48	0.46	0.49	0.09	0.49	0.08	0.52
Usf2	0	0	0.46	0.48	0.44	0.05	0.04	0.04	0.04	0.04	0.05	0.39	0.05	0.05	0.32	0.05	0.06	0.05	0.06	0.06	0.05	0.06	0.04	0.05	0.05	0.22	0.23	0.2	0.08	0.07	0.06	0.06	0.08	0.07	0.06	0.15	0.07	0.06	0.05	0.13	0.06	0.07	0.06	0.07	0.08	0.11	0.08	0.1	0.07
Vdr	0.01	0.15	0.46	0.44	0.42	0.07	0.21	0.2	0.12	0.06	0.06	0.34	0.25	0.23	0.32	0.05	0.08	0.09	0.09	0.09	0.08	0.1	0.06	0.06	0.07	0.21	0.21	0.19	0.08	0.21	0.22	0.22	0.08	0.36	0.05	0.15	0.28	0.27	0.07	0.13	0.21	0.21	0.21	0.22	0.21	0.1	0.23	0.09	0.26
Vsx2	0	0	0.55	0.5	0.5	0.05	0.06	0.04	0.04	0.05	0.04	0.38	0.06	0.06	0.34	0.06	0.05	0.06	0.05	0.06	0.06	0.06	0.05	0.06	0.05	0.24	0.23	0.22	0.08	0.08	0.08	0.08	0.07	0.08	0.06	0.17	0.09	0.08	0.06	0.14	0.06	0.07	0.07	0.08	0.07	0.11	0.07	0.09	0.08
Wt1	0	0	0.52	0.53	0.51	0.06	0.05	0.05	0.06	0.04	0.05	0.42	0.06	0.06	0.36	0.06	0.07	0.07	0.06	0.06	0.06	0.07	0.07	0.05	0.06	0.24	0.24	0.23	0.06	0.08	0.07	0.08	0.08	0.06	0.06	0.18	0.08	0.08	0.07	0.15	0.08	0.08	0.07	0.08	0.08	0.12	0.07	0.09	0.09
Yy1	0	0	0.57	0.55	0.52	0.05	0.06	0.05	0.06	0.06	0.05	0.4	0.07	0.06	0.38	0.06	0.07	0.06	0.06	0.07	0.06	0.06	0.06	0.06	0.05	0.25	0.23	0.24	0.08	0.07	0.07	0.08	0.07	0.07	0.05	0.18	0.08	0.08	0.07	0.15	0.07	0.07	0.07	0.07	0.09	0.12	0.06	0.11	0.09
Zbtb16	0	0	0.56	0.56	0.54	0.05	0.05	0.05	0.05	0.04	0.04	0.44	0.07	0.05	0.4	0.07	0.07	0.08	0.06	0.07	0.06	0.06	0.06	0.06	0.07	0.26	0.27	0.26	0.09	0.09	0.09	0.1	0.08	0.08	0.06	0.18	0.09	0.07	0.06	0.17	0.08	0.07	0.08	0.08	0.08	0.12	0.07	0.12	0.08
Zbtb33	0	0	0.6	0.59	0.57	0.06	0.06	0.06	0.05	0.07	0.05	0.43	0.05	0.07	0.4	0.08	0.09	0.07	0.07	0.07	0.07	0.07	0.07	0.06	0.06	0.26	0.25	0.26	0.08	0.08	0.09	0.08	0.08	0.07	0.08	0.19	0.09	0.09	0.07	0.15	0.08	0.08	0.08	0.06	0.08	0.12	0.08	0.13	0.09
Zbtb6	0	0	0.62	0.58	0.58	0.05	0.06	0.06	0.06	0.06	0.06	0.49	0.07	0.08	0.42	0.08	0.08	0.08	0.07	0.07	0.08	0.06	0.07	0.08	0.07	0.28	0.27	0.26	0.08	0.08	0.1	0.09	0.08	0.09	0.08	0.19	0.09	0.09	0.07	0.15	0.09	0.08	0.08	0.08	0.08	0.15	0.09	0.11	0.1
Zbtb7a	0	0	0.63	0.6	0.61	0.06	0.05	0.06	0.05	0.07	0.05	0.47	0.07	0.07	0.45	0.06	0.08	0.09	0.06	0.09	0.07	0.07	0.07	0.06	0.08	0.32	0.28	0.28	0.08	0.09	0.09	0.09	0.06	0.08	0.07	0.21	0.1	0.1	0.07	0.18	0.1	0.1	0.09	0.09	0.09	0.16	0.09	0.13	0.08
Zbtb7b	0	0	0.67	0.64	0.63	0.07	0.06	0.06	0.05	0.05	0.05	0.51	0.08	0.07	0.48	0.08	0.09	0.07	0.08	0.07	0.07	0.08	0.09	0.07	0.06	0.29	0.29	0.28	0.1	0.1	0.1	0.11	0.08	0.09	0.08	0.22	0.1	0.1	0.09	0.17	0.09	0.1	0.09	0.1	0.09	0.14	0.08	0.13	0.1
Zeb1	0	0	0.69	0.66	0.62	0.06	0.06	0.07	0.05	0.07	0.05	0.51	0.08	0.07	0.44	0.08	0.09	0.07	0.08	0.07	0.08	0.08	0.07	0.07	0.06	0.29	0.29	0.29	0.1	0.11	0.08	0.1	0.09	0.09	0.07	0.22	0.09	0.1	0.09	0.18	0.09	0.1	0.08	0.08	0.1	0.15	0.09	0.14	0.09
Zfp143	0	0	0.7	0.69	0.64	0.07	0.07	0.06	0.06	0.05	0.05	0.52	0.08	0.08	0.48	0.09	0.08	0.09	0.07	0.07	0.08	0.09	0.07	0.07	0.07	0.33	0.3	0.31	0.09	0.09	0.1	0.1	0.09	0.08	0.07	0.23	0.09	0.1	0.09	0.2	0.1	0.1	0.1	0.1	0.1	0.17	0.1	0.15	0.11
Zfp161	0	0	0.73	0.71	0.67	0.08	0.07	0.07	0.06	0.07	0.06	0.54	0.08	0.08	0.48	0.09	0.09	0.08	0.09	0.07	0.07	0.08	0.07	0.08	0.07	0.34	0.34	0.31	0.09	0.11	0.1	0.1	0.1	0.09	0.08	0.22	0.1	0.11	0.08	0.21	0.11	0.11	0.11	0.1	0.1	0.18	0.09	0.14	0.1
Zfp238	0	0	0.75	0.71	0.72	0.08	0.06	0.06	0.07	0.06	0.06	0.56	0.08	0.08	0.5	0.09	0.1	0.08	0.08	0.09	0.1	0.09	0.09	0.07	0.08	0.36	0.33	0.33	0.11	0.09	0.11	0.1	0.11	0.09	0.09	0.25	0.12	0.1	0.09	0.22	0.1	0.11	0.1	0.1	0.09	0.16	0.11	0.16	0.11
Zfp354c	0	0	0.78	0.76	0.72	0.08	0.06	0.06	0.07	0.07	0.05	0.59	0.09	0.08	0.54	0.1	0.09	0.09	0.08	0.08	0.09	0.09	0.07	0.08	0.07	0.36	0.34	0.36	0.12	0.12	0.11	0.11	0.11	0.1	0.08	0.24	0.11	0.11	0.09	0.24	0.13	0.11	0.11	0.1	0.11	0.18	0.12	0.16	0.12
Zfp384	0	0	0.78	0.75	0.75	0.09	0.08	0.07	0.07	0.07	0.06	0.6	0.07	0.07	0.54	0.1	0.1	0.08	0.09	0.09	0.09	0.09	0.07	0.08	0.07	0.4	0.36	0.36	0.11	0.11	0.12	0.12	0.1	0.1	0.09	0.27	0.11	0.12	0.09	0.22	0.11	0.1	0.11	0.1	0.11	0.2	0.11	0.16	0.11
Zfp628	0	0	0.81	0.8	0.77	0.08	0.09	0.06	0.07	0.09	0.06	0.62	0.1	0.08	0.58	0.1	0.11	0.09	0.08	0.11	0.11	0.1	0.09	0.09	0.07	0.4	0.39	0.36	0.12	0.12	0.11	0.11	0.12	0.11	0.09	0.28	0.12	0.11	0.09	0.22	0.12	0.13	0.11	0.1	0.11	0.18	0.11	0.17	0.12
gr	0.01	0.18	0.78	0.79	0.76	0.08	0.24	0.25	0.1	0.09	0.1	0.62	0.17	0.16	0.55	0.06	0.07	0.15	0.15	0.14	0.1	0.1	0.06	0.06	0.07	0.36	0.37	0.37	0.08	0.31	0.31	0.31	0.09	0.34	0.05	0.27	0.27	0.29	0.07	0.23	0.21	0.23	0.2	0.2	0.22	0.2	0.21	0.18	0.24
pr	0	0	0.87	0.87	0.81	0.08	0.09	0.07	0.08	0.07	0.07	0.66	0.09	0.09	0.59	0.1	0.11	0.1	0.1	0.1	0.09	0.1	0.09	0.09	0.08	0.44	0.41	0.41	0.12	0.12	0.13	0.11	0.12	0.11	0.09	0.3	0.13	0.14	0.1	0.25	0.13	0.12	0.11	0.11	0.12	0.19	0.12	0.19	0.12
t	0	0	0.89	0.88	0.85	0.09	0.08	0.08	0.07	0.08	0.07	0.69	0.1	0.08	0.61	0.1	0.1	0.09	0.1	0.09	0.1	0.11	0.1	0.09	0.09	0.41	0.42	0.38	0.11	0.12	0.11	0.13	0.13	0.1	0.09	0.3	0.13	0.11	0.08	0.26	0.12	0.13	0.12	0.12	0.14	0.21	0.13	0.19	0.13
[truncated: 218 more columns]
